# Supplementary material for: Prion-like low complexity regions enable avid virus-host interactions during HIV-1 infection
Source: PubMed Central journal article supplement (PMC9537594; doi:10.1038/s41467-022-33662-6), 2022-10-06
Supplement: 41467_2022_33662_MOESM1_ESM.pdf [file 41467_2022_33662_MOESM1_ESM.pdf]

## **Prion-like low complexity regions enable avid virus-host interactions during HIV-1 infection**

Guochao Wei, Naseer Iqbal, Valentine V. Courouble, Ashwanth C. Francis, Parmit K. Singh, Arpa Hudait, Arun S. Annamalai, Stephanie Bester, Szu-Wei Huang, Nikoloz Shkriabai, Lorenzo Briganti, Reed Haney, Vineet N. KewalRamani, Gregory A. Voth, Alan N. Engelman, Gregory B. Melikyan, Patrick R. Griffin, Francisco Asturias, Mamuka Kvaratskhelia

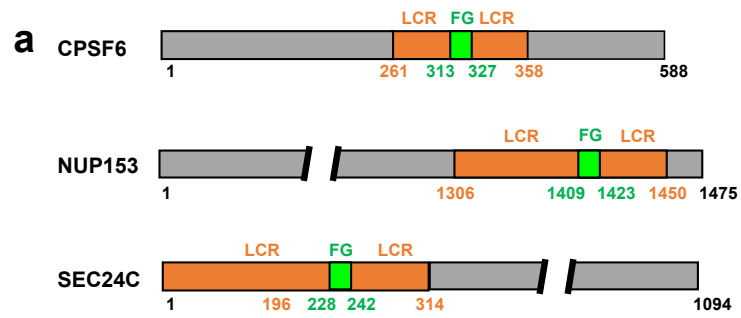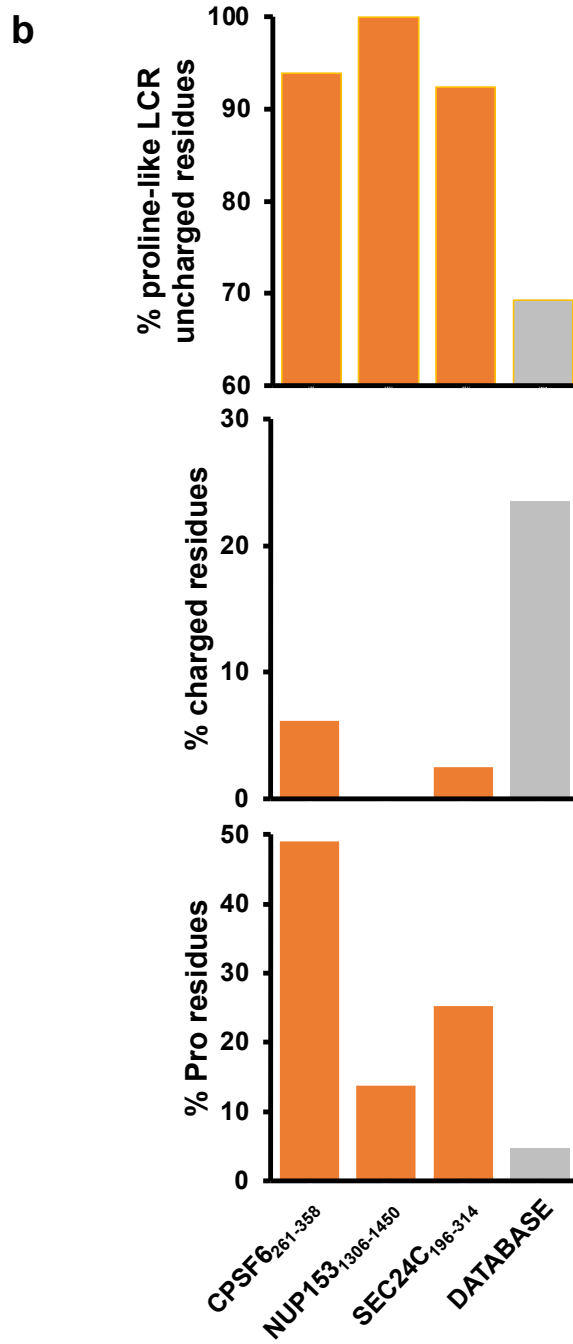

**Supplementary Figure 1. Prion-like LCRs in CPSF6, NUP153 and SEC24C.** (a) Schematic of CPSF6, NUP153 and SEC24C to show the prion-like LCR (orange) and FG containing peptides (green). (b) Relative abundance of prion-like LCR defining uncharged (top), charged (middle) and Pro (bottom) residues in indicated protein segments. The values were calculated by dividing numbers of prion-like LCR defining uncharged (Ala, Gly, Val, Phe, Tyr, Leu, Ile, Ser, Thr, Pro, Asn, Gln), charged (Asp, Glu, Lys, Arg), and Pro residues by total number of amino acids in respective protein fragments. For the database values an average of all protein sequences deposited in the UniProtKB/Swiss-Prot database were utilized. The database consisted of 565928 sequence entries from 281485 unique references comprising 204173280 amino acids at the time of analysis (<https://web.expasy.org/docs/relnotes/relstat.html>). The database breaks down each amino acid into a percentage of the total number of amino acids. Source data are provided as a Source Data file. Abbreviation: LCR: low complexity region.

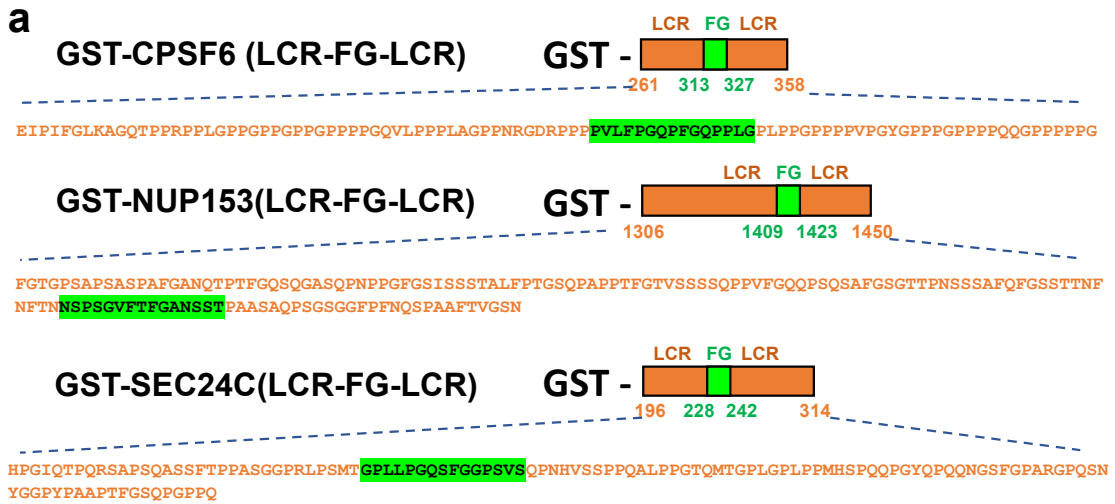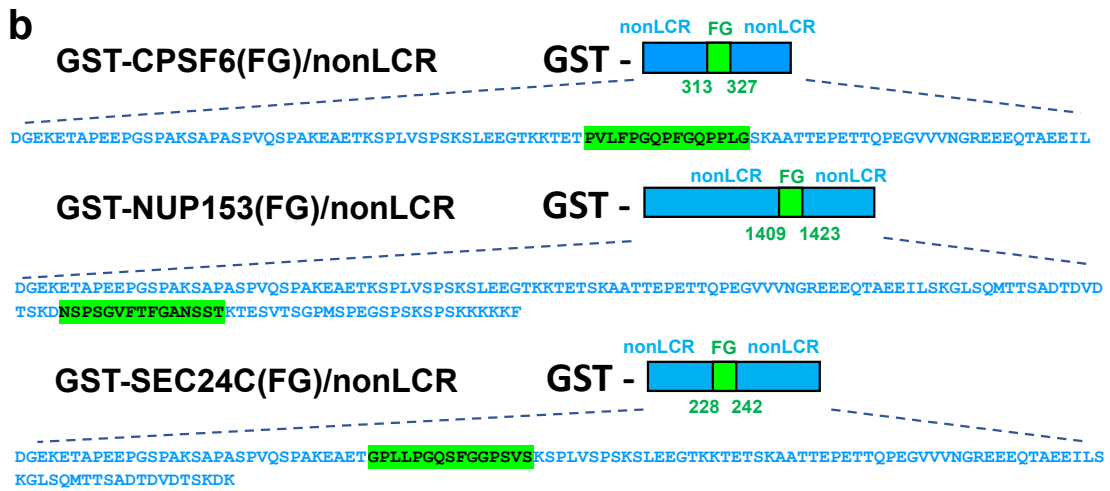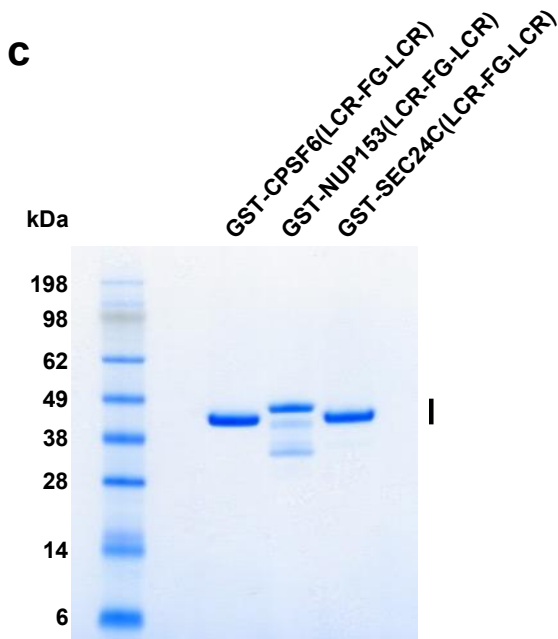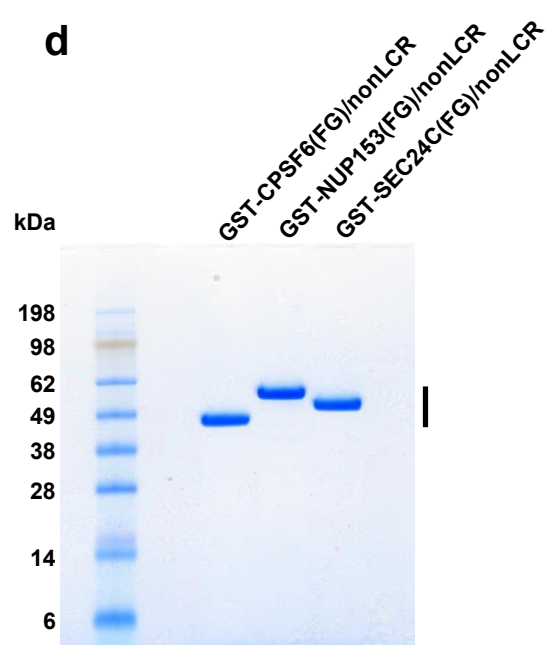

**Supplementary Figure 2. Preparation of recombinant proteins.** Schematic of WT (**a**) and chimeric (**b**) CPSF6, NUP153 and SEC24C proteins. Representative SDS-PAGE images of WT (**c**) and chimeric (**d**) purified recombinant proteins are shown. Expression of target proteins are indicated by a side bar. The experiment was repeated 3 times independently with similar results. Abbreviation: LCR: low complexity region.

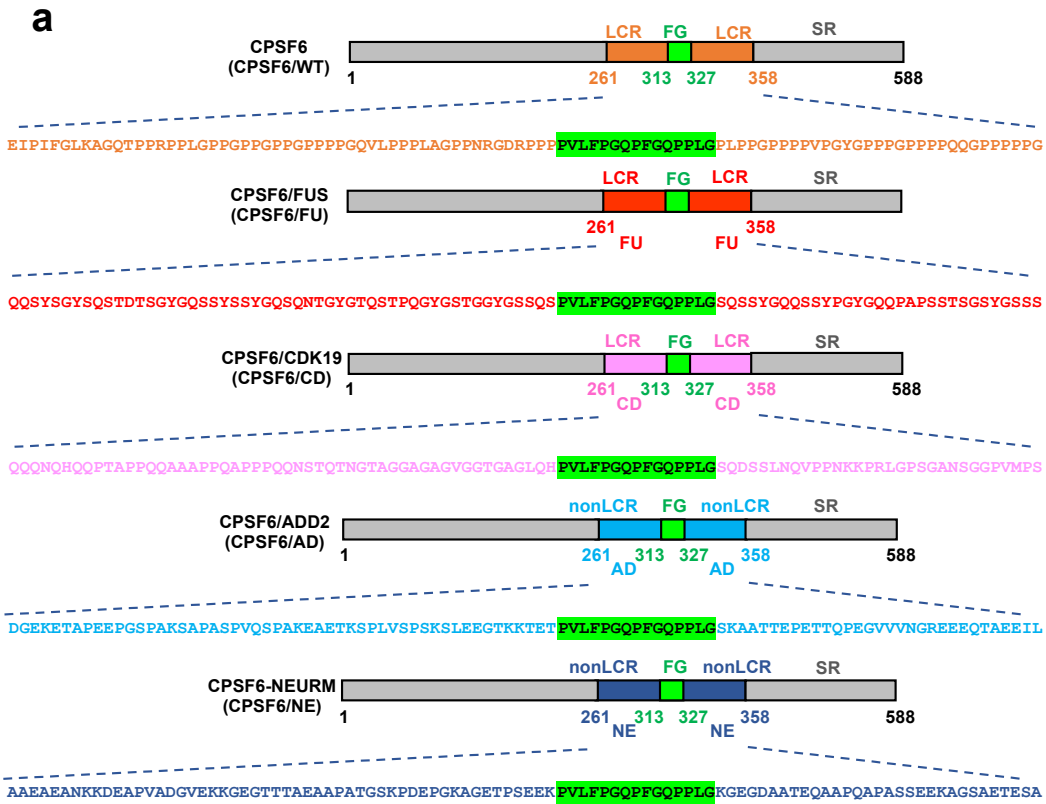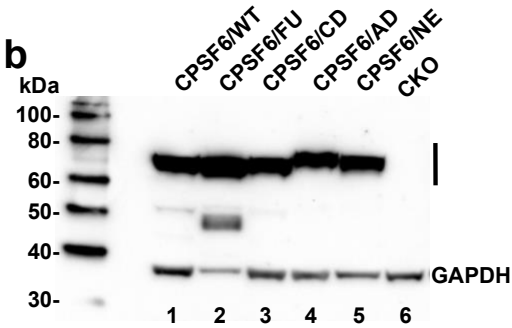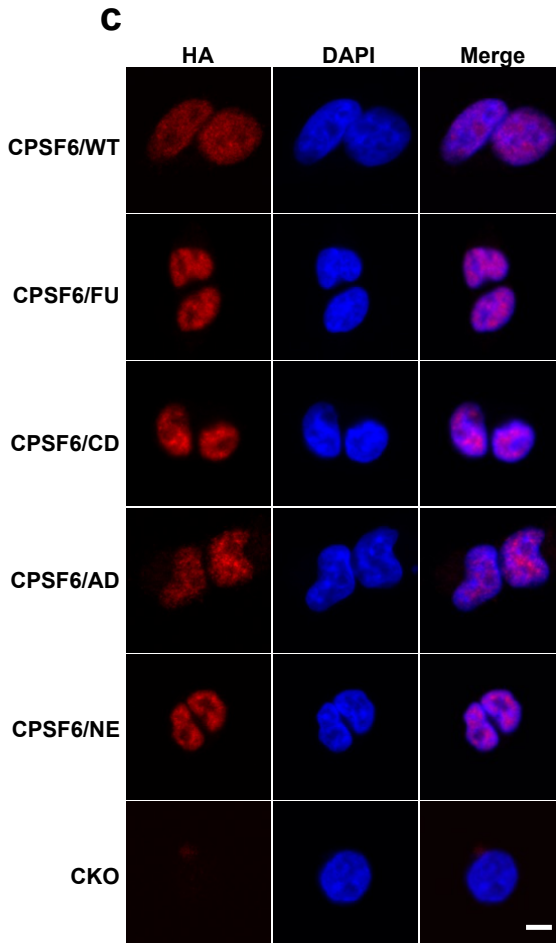

**Supplementary Figure 3. Overexpression of WT and chimeric full-length CPSF6 proteins in CKO cells.** (a) Schematic of WT and chimeric CPSF6 proteins. CPSF6/FU: CPSF6 LCR segments flanking CPSF6<sub>313-327</sub>(FG) (green) were replaced with alternative LCR segments from FUS<sub>35-117</sub> (red). CPSF6/CD: CPSF6 LCR segments flanking CPSF6<sub>313-327</sub>(FG) (green) were replaced with alternative LCR segments from CDK19<sub>374-456</sub> (magenta). CPSF6/AD: CPSF6 LCR segments flanking CPSF6<sub>313-327</sub>(FG) (green) were replaced with non-LCR, flexible segments from ADD2<sub>580-662</sub> (cyan). CPSF6/NE: CPSF6 LCR segments flanking CPSF6<sub>313-327</sub>(FG) (green) were replaced with non-LCR, flexible segments from NEURM<sub>97-179</sub> (dark blue). (b) Representative immunoblotting to show expression of WT and chimeric CPSF6 proteins in CKO cells. Briefly, CPSF6-KO 293T cells were transduced with VSV-G pseudotyped MLV-based retroviral vector encoding HA-tagged WT and chimeric CPSF6 proteins. Transduced cells were selected with 2µg/ml puromycin. Expression of target proteins are indicated by a side bar. The experiment was repeated 3 times independently with similar results. (c) Immunofluorescence to detect the expression of WT and chimeric CPSF6 proteins in CKO cells. Cells were immunostained for HA-tagged protein (red) and nuclei DAPI (blue). Scale bar is 5 µm. The experiment was repeated 3 times independently with similar results. Abbreviations: AD: ADD2; NE: NEURM; FU: FUS; CD: CDK19; CKO: CPSF6 knock-out; LCR: low complexity region.

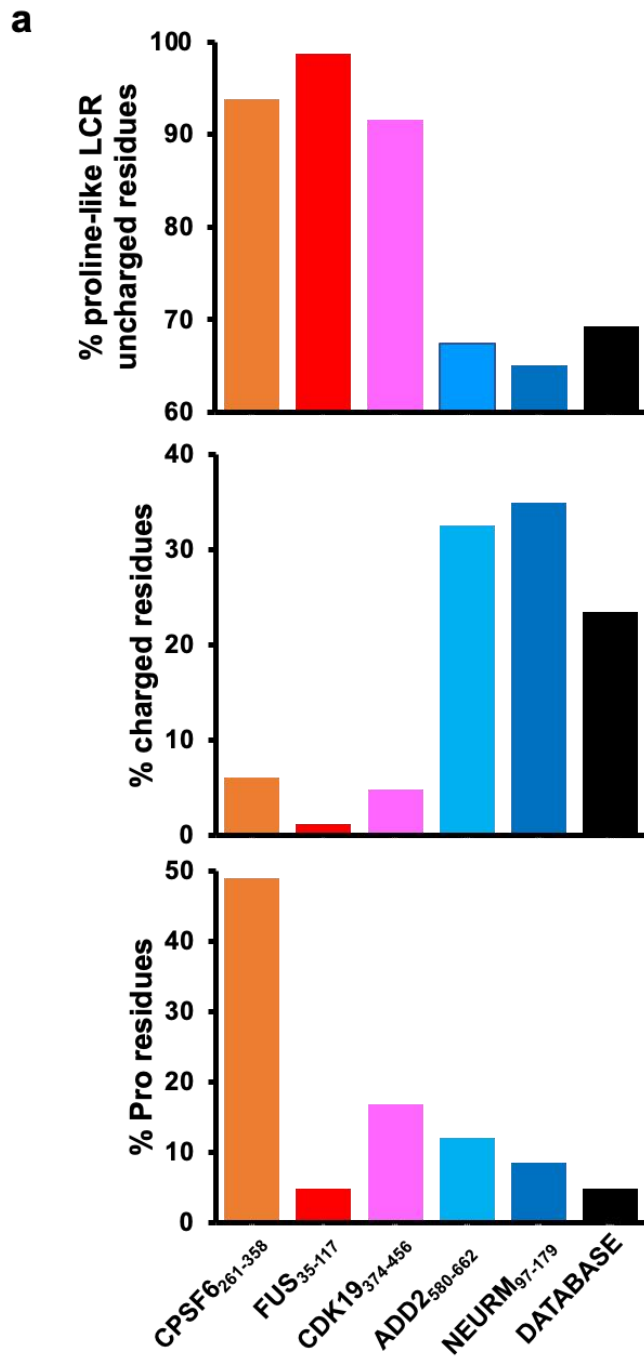

**b**

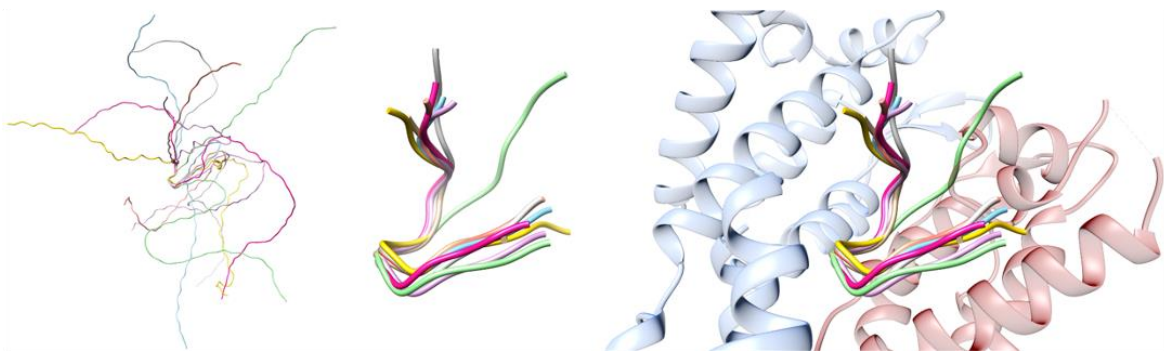



**Supplementary Figure 4. Amino acid composition and AlphaFold structural predictions of chimeric protein segments.** (a) Relative abundance of prion-like LCR defining uncharged (top), charged (middle) and Pro (bottom) residues in indicated protein segments. The values were derived as explained in the legend of Supplementary Figure 1. Source data are provided as a Source Data file (b) AlphaFold results from WT CPSF6<sub>261-358</sub> and corresponding chimeric protein segments. Left panel: WT and chimeric protein segments aligned through the conserved 15-mer CPSF6 FG peptide. Middle panel: a zoomed in view of the 15-mer CPSF6 peptide in the context of WT CPSF6 (yellow), CPSF6(FG)/FU (green), CPSF6(FG)/CD (purple), CPSF6(FG)/AD (light blue) and CPSF6(FG)/NE (pink). Right panel: The 15-mer CPSF6 peptides from chimeric proteins were aligned with crystallographic WT CPSF6 FG peptide bound to CA<sub>hex</sub> (Supplementary Fig 12, for clarity only one binding site formed by two CA subunits colored in light cyan and light magenta is shown). Note, only noticeable difference seen for the FG peptides is in the context of CPSF6(FG)/FU (where native LCRs were replaced with alternative LCRs from FUS). The 15-mer FG peptide adopts a slightly more closed “U” shaped conformation in CPSF6(FG)/FU (green) compared with its WT counterpart (yellow). Importantly, LCR containing full-length CPSF6/FU and GST-CPSF6(FG)/FU proteins were fully functional in virology and biochemistry assays. No noticeable differences in the “U” shape conformation of the FG peptides or their predicted interactions with the hydrophobic CA pocket were observed in the context of nonLCR chimeric proteins CPSF6(FG)/AD (light blue) and CPSF6(FG)/NE (pink), or LCR containing CPSF6(FG)/CD (purple).

**a**

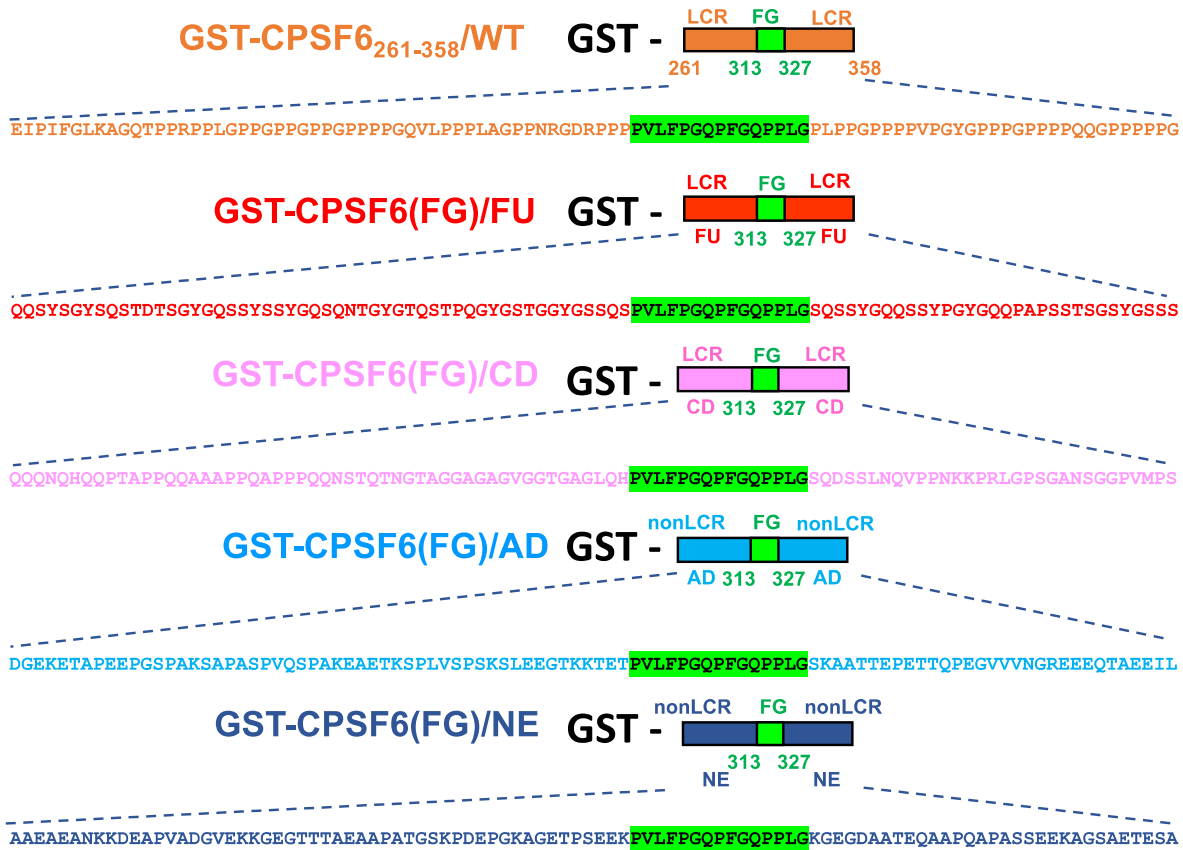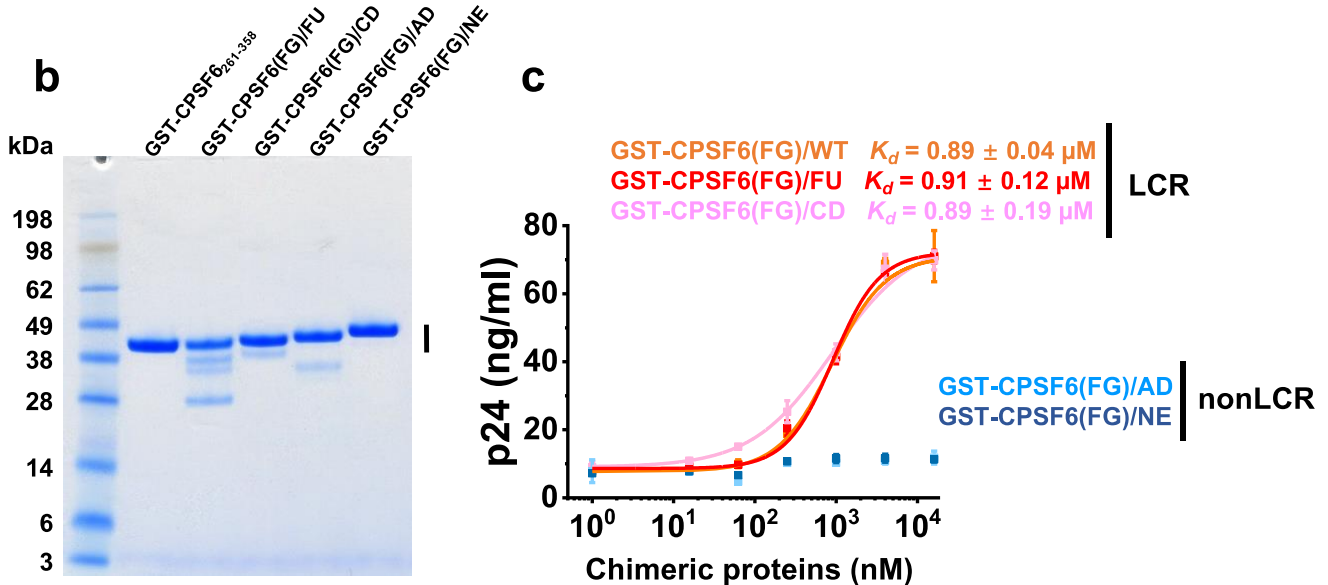

**Supplementary Figure 5. Interactions of recombinant WT GST-CPSF6<sub>261-358</sub> and corresponding chimeric proteins with isolated native HIV-1 cores.** (a) Schematic of WT and chimeric proteins. (b) Representative SDS-PAGE image of indicated purified recombinant proteins used for binding assays. (c) Quantification of GST-mediated affinity pull-down of native HIV-1 cores with indicated concentrations of purified recombinant proteins: GST-CPSF6<sub>261-358</sub>/WT; GST-CPSF6(FG)/FU; GST-CPSF6(FG)/CD; GST-CPSF6(FG)/AD; GST-

CPSF6(FG)/NE. The data (mean values  $\pm$  SD) from three independent experiments are shown. The results were analyzed by Origin 2019 (v.9.6) software to determine binding  $K_d$  values. Source data are provided as a Source Data file. Abbreviations: AD: ADD2; NE: NEURM; FU: FUS; CD: CDK19; LCR: low complexity region.

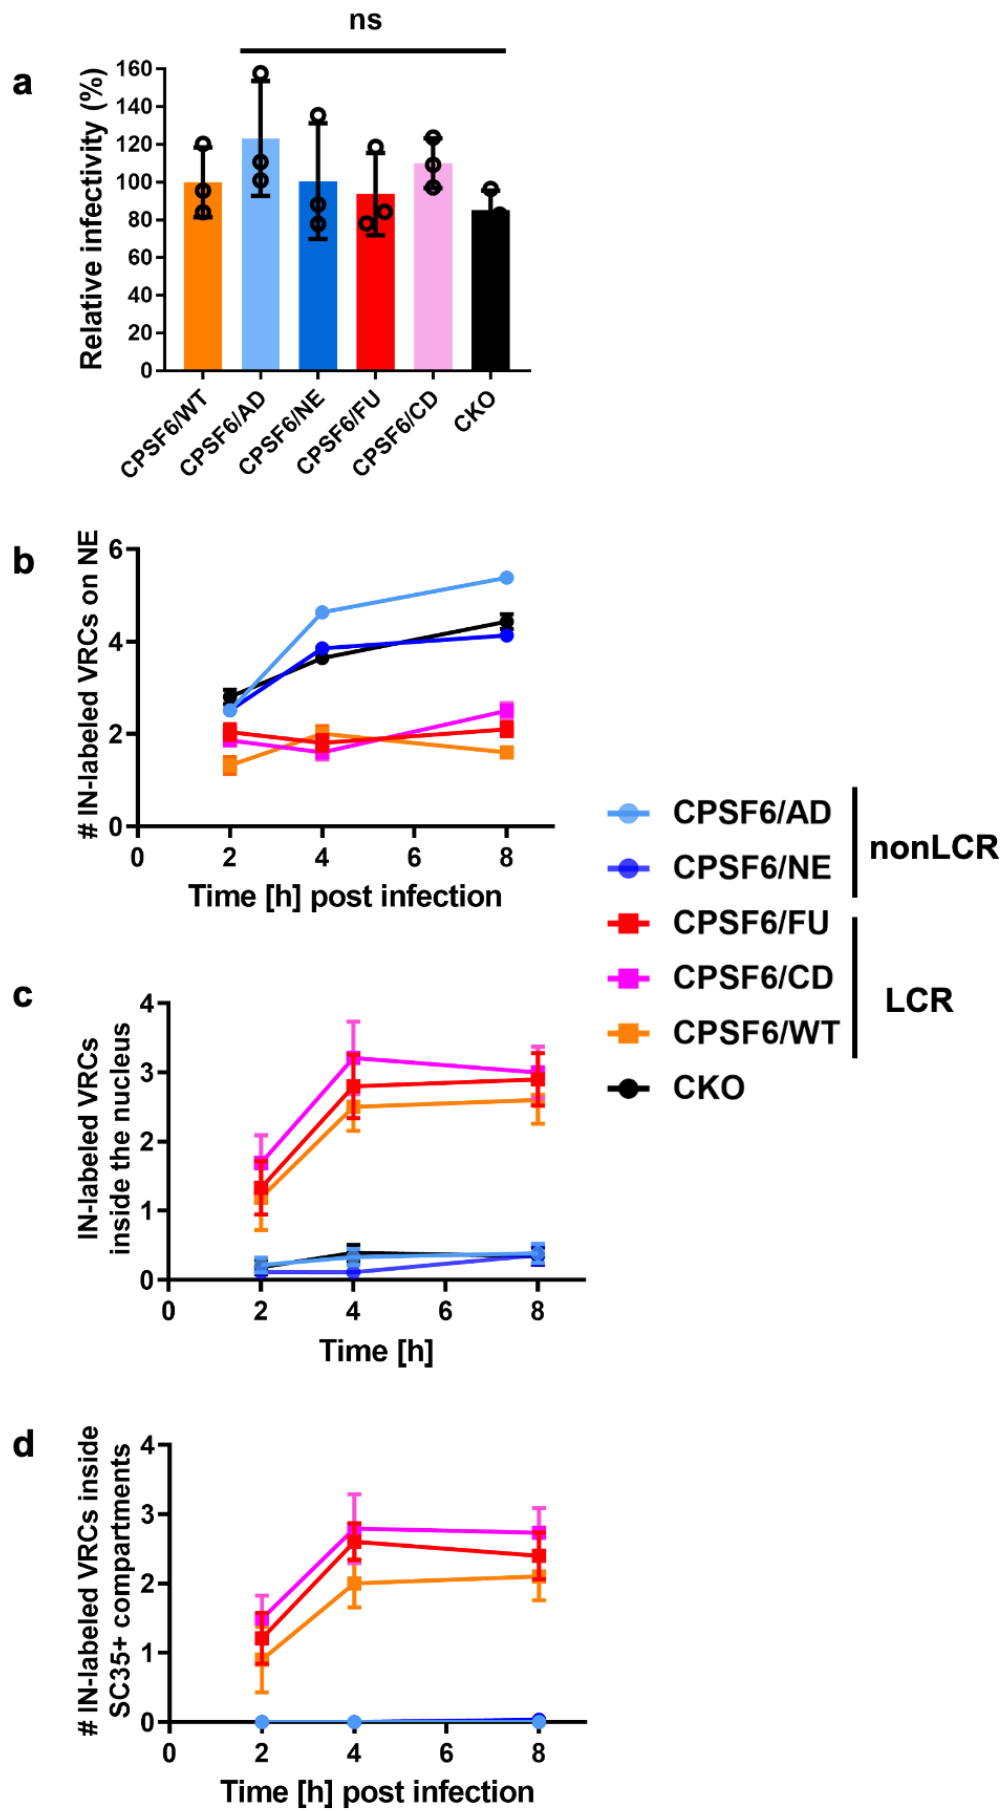

**Supplementary Figure 6. Infectivity and kinetics of nuclear import of HIV-1 VRCs in cells expressing the chimeric proteins.** (a) Relative infectivity of VSV-G pseudotyped viruses in CKO cells stably expressing indicated CPSF6 chimeric proteins. The data (mean  $\pm$  s.d.) from three independent experiments are shown. Statistical analysis was carried out with Student's two-sample, two-tailed t-test (b-d) CKO cells stably expressing the indicated CPSF6 chimeric proteins were infected with INsfGFP labeled HIV pseudovirus. Cells were fixed at indicated time points, immuno-stained for nuclear speckles (SC35+) and the number of IN-labeled viral replication complexes (VRCs) in the nucleus was determined by confocal imaging. (b) Quantification of IN-VRCs on nuclear envelop. (c) The fraction of nuclei with IN-VRCs inside 0.5  $\mu$ m of the nucleoplasm. (d) Quantification of IN-VRCs colocalized with NSs. Data shows mean and SEM from >30 nuclei (n=31 at 2 h, n=36 at 4 h and n=32 at 8 h for each sample) analyzed in 2 independent experiment. Statistical significance of comparison for WT versus chimeric CPSF6 proteins was determined by Student t-test.  $P > 0.05$  was considered not significant (ns). Source data are provided as a Source Data file. Abbreviations: AD: ADD2; NE: NEURM; FU: FUS; CD: CDK19; CKO: CPSF6 knock-out; LCR: low complexity region.

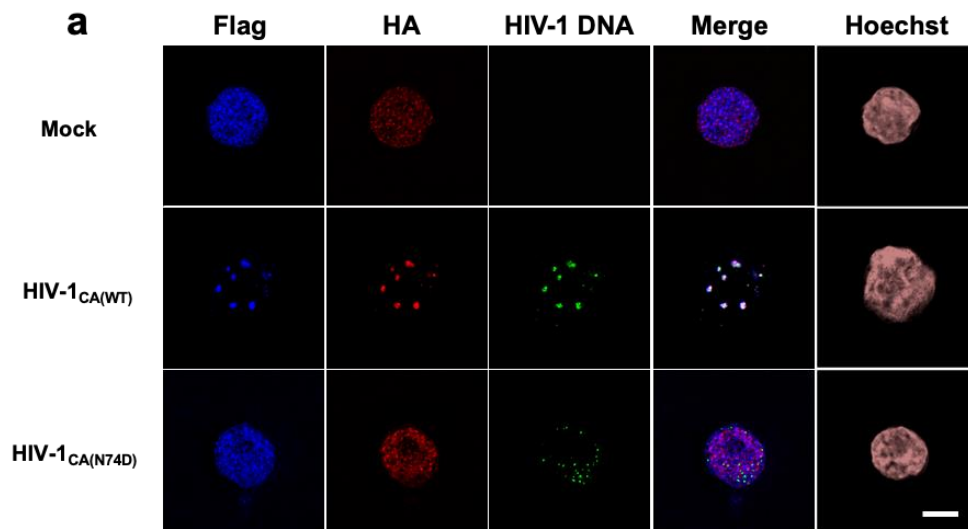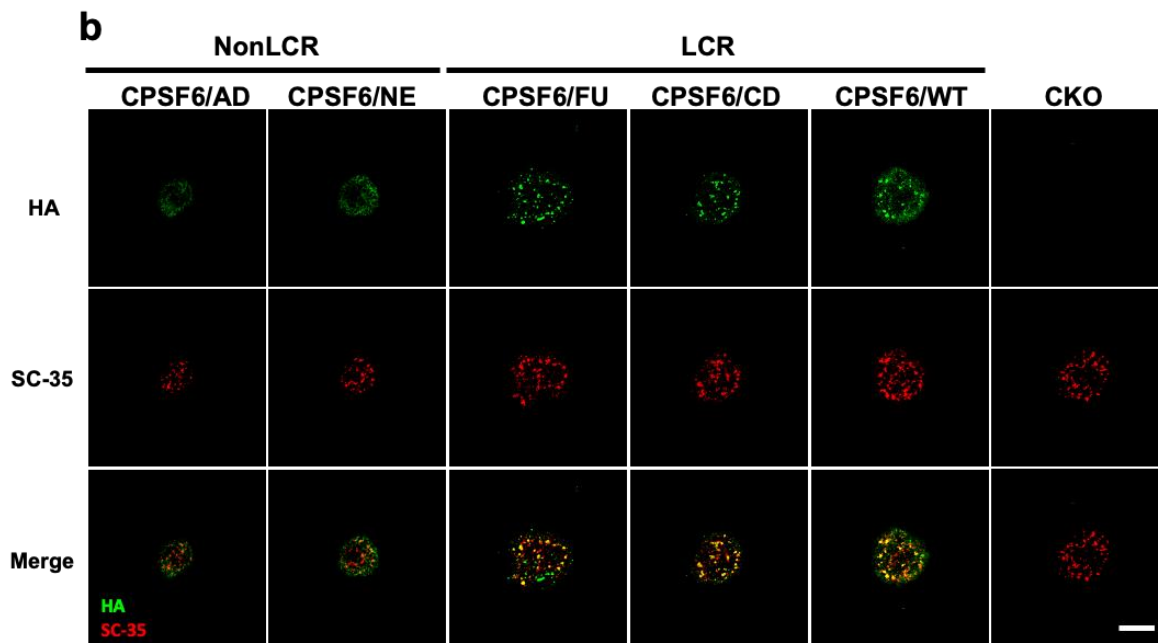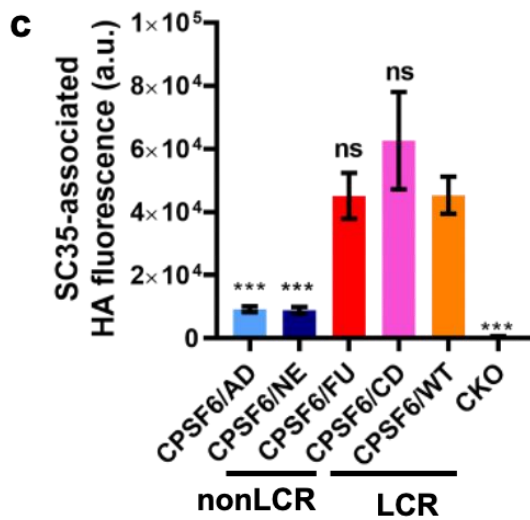

|          |                        |
|----------|------------------------|
| CPSF6/AD | $1.43 \times 10^{-25}$ |
| CPSF6/NE | $1.87 \times 10^{-24}$ |
| CPSF6/FU | 0.98                   |
| CPSF6/CD | 0.34                   |
| CKO      | $9.5 \times 10^{-107}$ |

**Supplementary Figure 7. Prion-like LCR containing WT and chimeric CPSF6 proteins accumulate around HIV-1 cores in the nuclei of infected cells.** (a) WT CPSF6 accumulates around HIV-1 cores in the nuclei of infected cells. Parental HEK293T and CKO cells expressing both HA- and flag-tagged full-length CPSF6 were infected with WT and N74D HIV-1 at MOI 50. After 6 hpi the samples were collected for immuno-fluorescence in situ hybridization (immuno-FISH). HIV-1 DNA was detected using a pool of probes targeting HIV-1 integrase region. Green indicates HIV-1 DNA. Red indicates HA-tagged CPSF6. Blue indicates Flag-tagged CPSF6. A single z section is presented. Scale bar is 5  $\mu$ m. The experiment was repeated 3 times independently with similar results. (b) Immunofluorescence to detect the accumulation of CPSF6 and chimeric proteins in HIV-1 infected HEK293T CKO cells. CKO 293T cells overexpressing HA tagged WT and chimeric CPSF6 proteins were infected with WT HIV-1 (MOI 50). After 6 hpi, cells were fixed and immunostained with anti-HA antibody (ab236632, Abcam) and anti-SC-35 antibody (ab11826, abcam). Green indicates HA-tagged WT and chimeric CPSF6 proteins. Red indicates nuclear speckles marker SC-35. A single z section is presented. Scale bar is 5  $\mu$ m. (c) Fluorescent intensity of HA tagged WT and chimeric CPSF6 proteins associated with SC35 in infected cells. Data was collected and analyzed from >6 cells (n=20 for CPSF6/WT, CPSF6/FU, CPSF6/AD and CPSF6/NE; n=8 for CPSF6/CD) each by using ICY image analysis software (<http://icy.bioimageanalysis.org/>) and shown with mean and SEM. Statistical significances of comparison of CPSF6/WT versus CPSF6/AD, CPSF6/NE, CPSF6/FU, CPSF6/CD and CKO were determined by Student's two-sample, two-tailed t-test.  $P > 0.05$  was considered not significant (ns) and  $p < 0.0001$  was considered highly significant (\*\*\*). P values of comparison for WT versus chimeric CPSF6 proteins were shown in the table on the right. Source data are provided as a Source Data file. Abbreviations: AD: ADD2; NE: NEURM; FU: FUS; CD: CDK19; CKO: CPSF6 knock-out; LCR: low complexity region; a.u.: arbitrary units.

### a Native cores

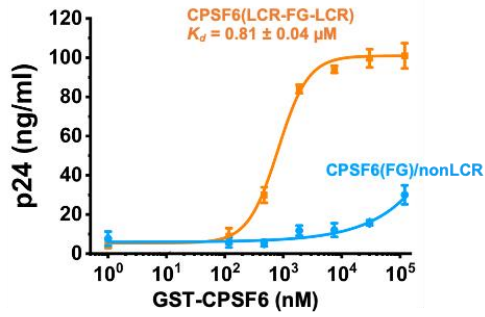

### b Isolated CA hexamers

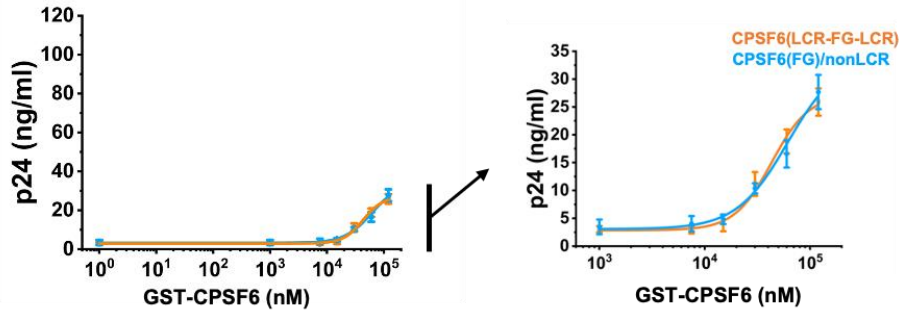

### c CA nanotubes

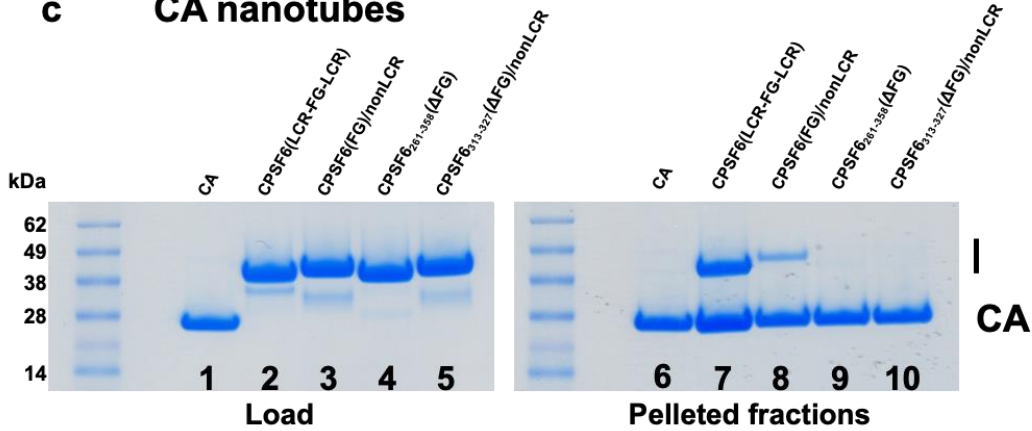

### d

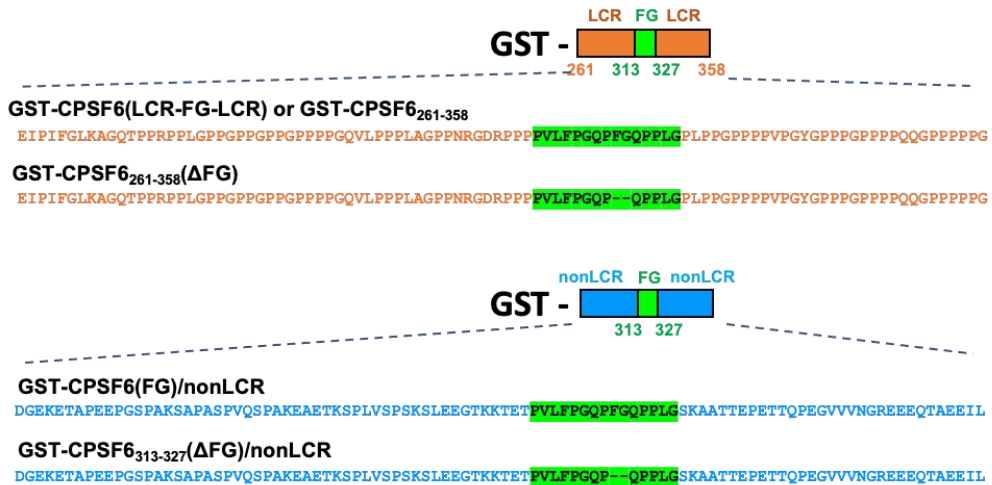



**Supplementary Figure 8. Interactions of recombinant GST-CPSF6(LCR-FG-LCR) and GST-CPSF6(FG)/nonLCR proteins with CA assemblies.** (a) Quantitation of GST-mediated affinity pull-down of native HIV-1 cores bound to indicated concentrations of GST-CPSF6(LCR-FG-LCR) and GST-CPSF6(FG)/nonLCR proteins. Protein solubility capped the tested concentration range at 120  $\mu$ M for GST-CPSF6(LCR-FG-LCR) and GST-CPSF6(FG)/nonLCR. GST-CPSF6(LCR-FG-LCR) bound to native cores with high affinity, whereas GST-CPSF6(FG)/nonLCR displayed low affinity binding. The averaged data (+/- SD) from three independent experiments are shown. Source data are provided as a Source Data file (b) Quantification of GST-mediated affinity pull-down of isolated, cross-linked CA hexamers bound to indicated concentrations of GST-CPSF6(LCR-FG-LCR) and GST-CPSF6(FG)/nonLCR; Both GST-CPSF6(LCR-FG-LCR) and GST-CPSF6(FG)/nonLCR displayed similarly low affinity binding to isolated CA hexamers. Collectively, results in (a) and (b) indicate the importance of both CPSF6 LCR and the mature CA lattice for high affinity binding. The averaged data (+/- SD) from three independent experiments are shown. Source data are provided as a Source Data file (c) Representative SDS-PAGE images of co-pelleting of indicated proteins with IP6 stabilized CA nanotubes. The protein concentrations and experimental conditions used in these assays closely mimic cryo-EM sample preparations. GST-CPSF6(LCR-FG-LCR) robustly bound to CA tubular assemblies, whereas consistent with a low affinity binding of the FG peptide in the absence of the flanking LCRs, only residual binding of GST-CPSF6(FG)/nonLCR to CA nanotubes was observed (compare lane 8 to lane 9). The analysis of corresponding GST-CPSF6<sub>261-358</sub>( $\Delta$ FG) and GST-CPSF6<sub>313-327</sub>( $\Delta$ FG)/nonLCR control proteins indicated that both high and low affinity interactions require the FG peptide. The experiment was repeated 3 times independently with similar results. (d) Schematics and primary sequences of GST-CPSF6(LCR-FG-LCR) (also referred here to as GST-CPSF6<sub>261-358</sub>), GST-CPSF6(FG)/nonLCR, GST-CPSF6<sub>261-358</sub>( $\Delta$ FG) and GST-CPSF6<sub>313-327</sub>( $\Delta$ FG)/nonLCR constructs. Abbreviation: LCR: low complexity region.

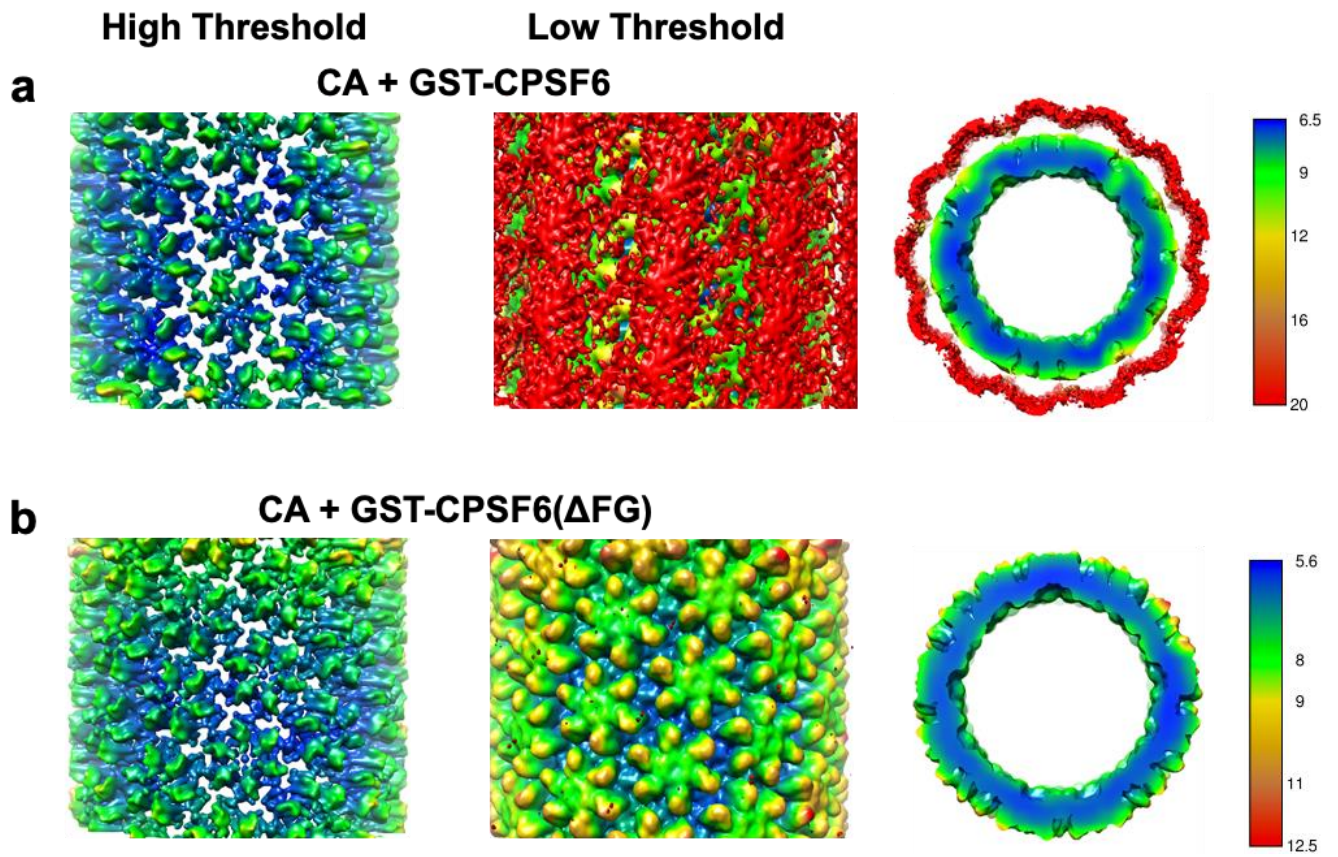

**Supplementary Figure 9. Cryo-EM maps of IP6-stabilized CA nanotubes in the presence of GST-CPSF<sub>6261-358</sub> or GST-CPSF<sub>6261-358</sub>( $\Delta$ FG). (a) The GST-CPSF<sub>6261-358</sub> cryo-EM map colored according to local resolution. (b) The GST-CPSF<sub>6261-358</sub>( $\Delta$ FG) cryo-EM map colored according to local resolution.**

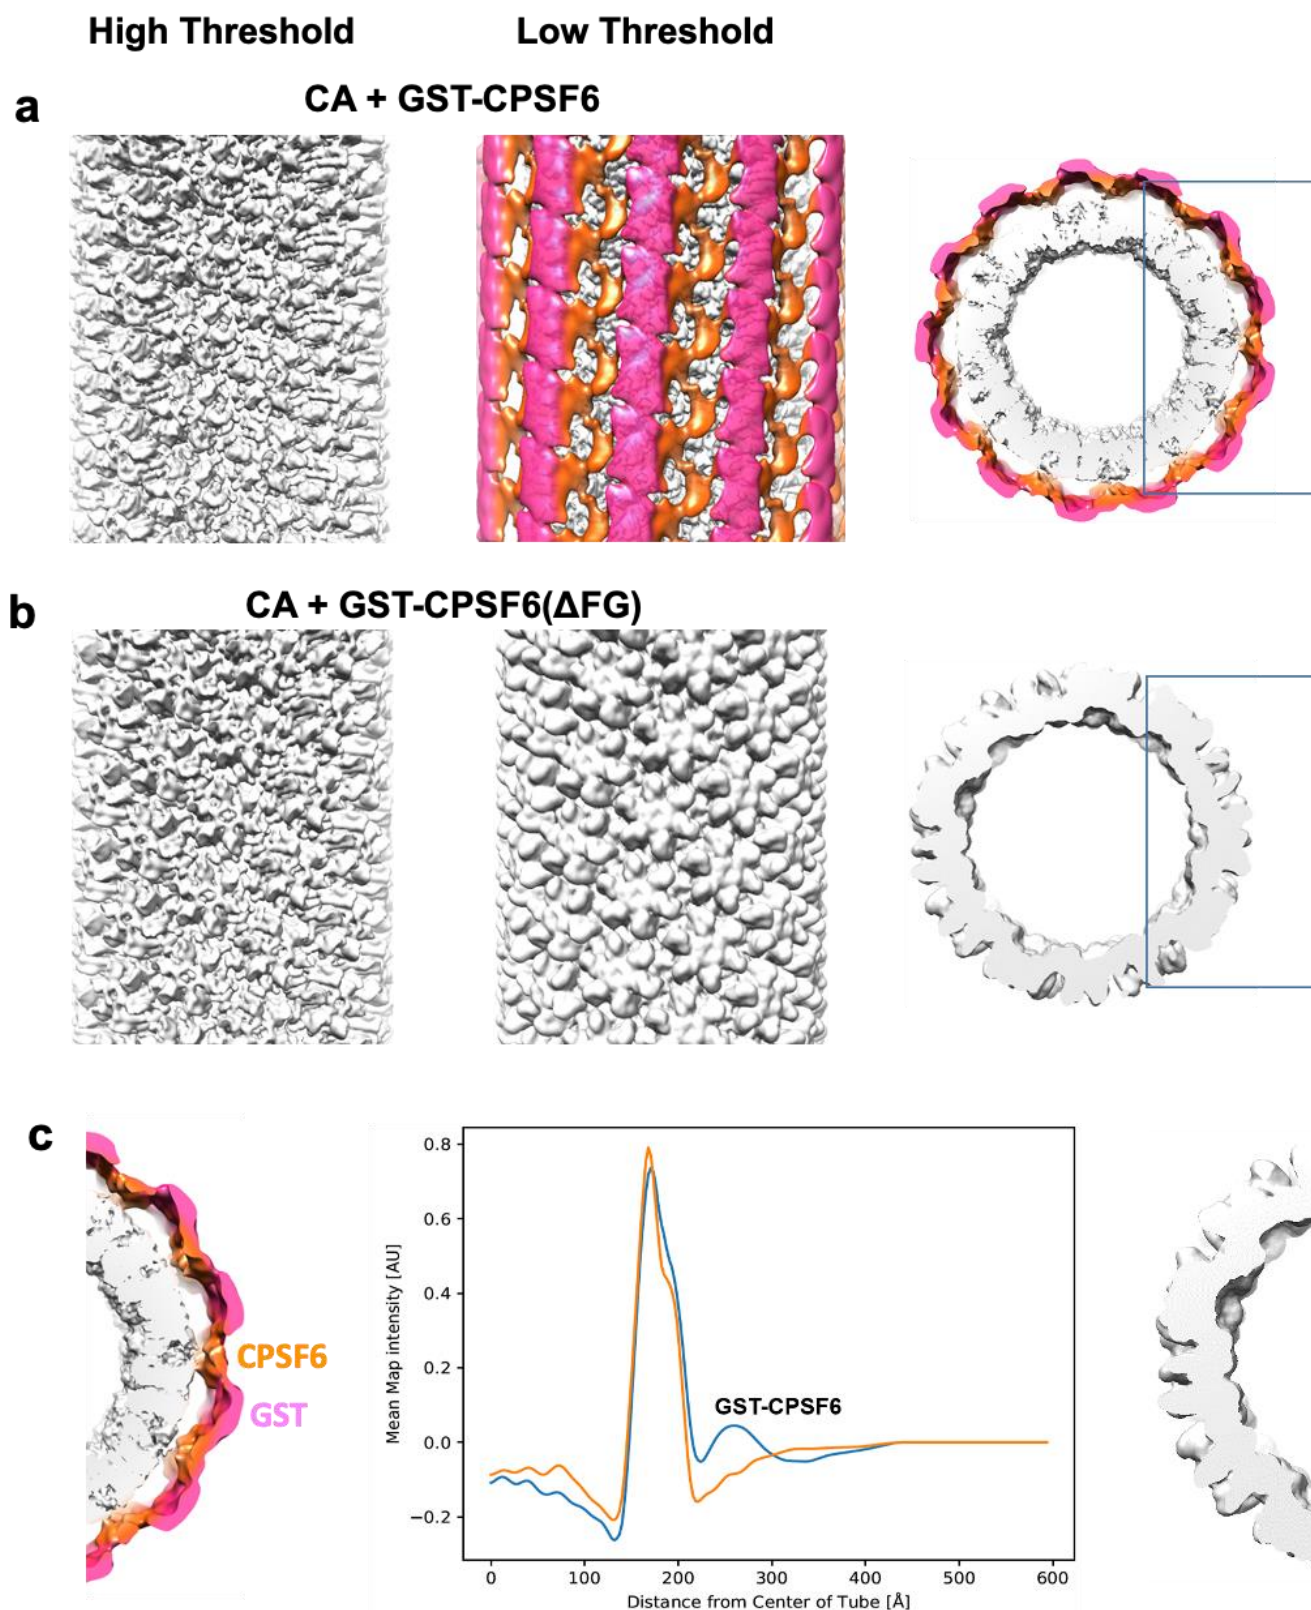

**Supplementary Figure 10. Cryo-EM maps of IP6-stabilized CA tubes in the presence of GST-CPSF6<sub>261-358</sub> or GST-CPSF6<sub>261-358</sub>( $\Delta$ FG).** (a) Cryo-EM map at overall resolution of  $\sim 7.9$  Å of a CA(A92E) tube in the presence of GST-CPSF6<sub>261-358</sub>, displayed at a threshold where CA hexamer features are clearly discernible (High Threshold), and a lower threshold (Low Threshold) that allows for visualization of partially ordered density evident in cryo-images and 2D class averages. The map is colored by radius to facilitate interpretation. Additional density (in orange) is apparent along the interfaces between rows of hexamers in the CA nanotubes. Also apparent is density

(in magenta) that matches the size and overall shape to the X-ray structure of a GST dimer. (b) Cryo-EM map at overall resolution  $\sim 7.0$  Å of a CA(A92E) nanotube following incubation with GST-CPSF<sub>6261-358</sub>(ΔFG), displayed at a threshold where CA hexamer features are clearly discernible (High Threshold), and a much lower threshold (Low Threshold). The map is colored by radius as in (a) and the only feature beyond the CA nanotube surface is small random noise, even when the map is displayed at the lowest possible threshold ( $>0.0001$ ). (c) Overlaying radial distribution density plots for CA + GST-CPSF<sub>6261-358</sub> vs CA + GST-CPSF<sub>6261-358</sub>(ΔFG) shows the positioning and proposed identity of additional density specifically seen only in the complex with GST-CPSF<sub>6261-358</sub>.



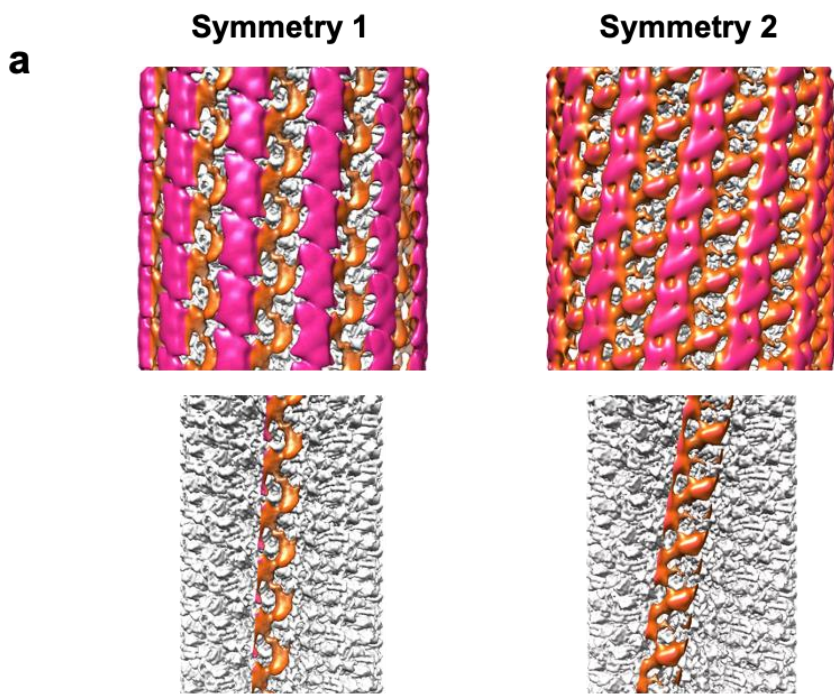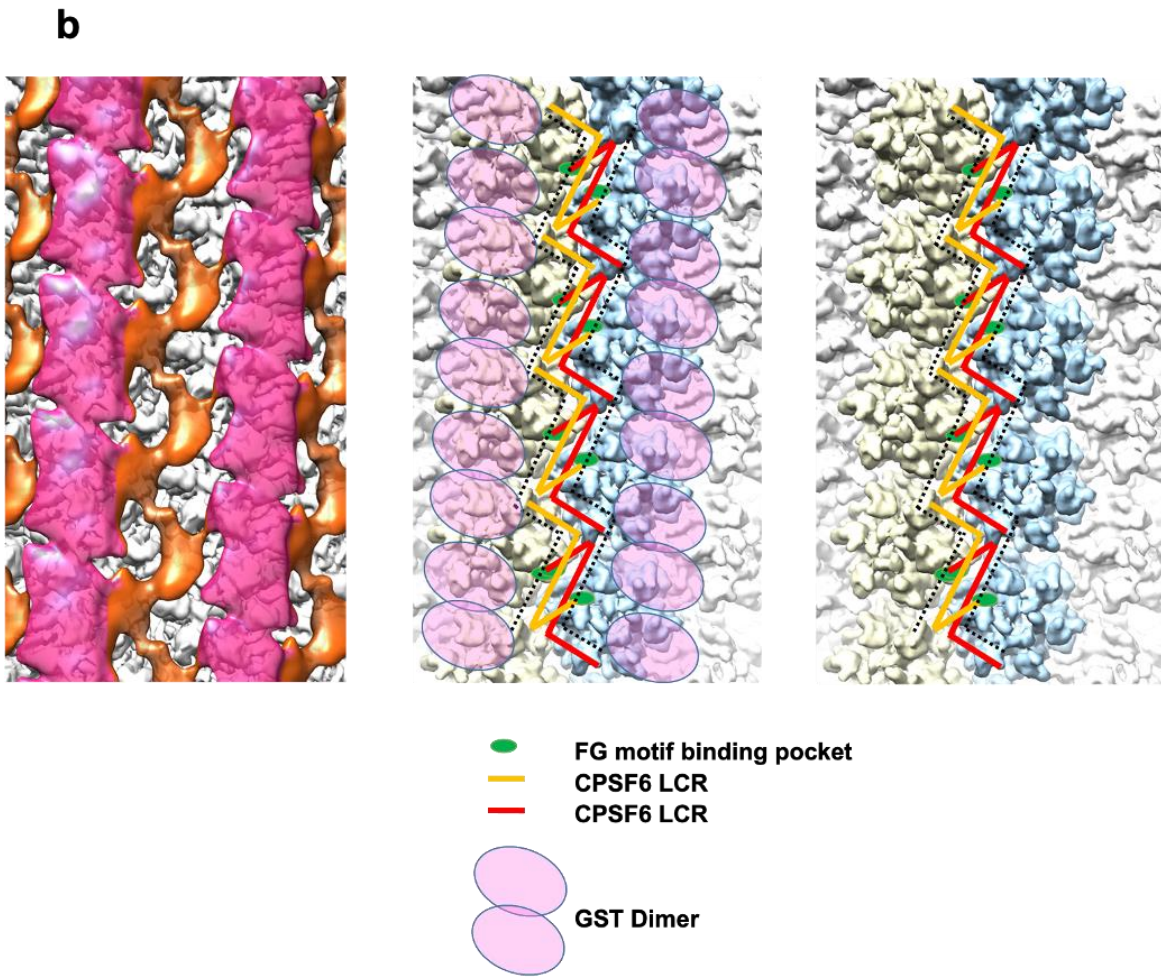

**Supplementary Figure 11. Cryo-EM analysis of CA + GST-CPSF6<sub>261-358</sub>.** (a) Comparison between two independent cryo-EM maps of CA + GST-CPSF6<sub>261-358</sub> calculated from CA tube with different helical symmetries. Top panels: in each map, zig-zagging CPSF6 densities (orange) extend between adjacent CA hexamer rows and are flanked by GST density (magenta). Bottom panels: slicing the maps to highlight CPSF6 density (orange) shows that the arrangement of CPSF6 is largely conserved in different symmetry maps; the only substantial difference is in the orientation of CPSF6 density due to the corresponding difference in helical symmetry between the CA nanotubes. (b) Schematic model to show multivalent assembly of CPSF6 templated by their interactions with the helical CA tube. The FG peptides (in light green) were used to set the register of plausible arrangements of CPSF6 LCRs (red and yellow lines) in the context of the density corresponding to CPSF6.

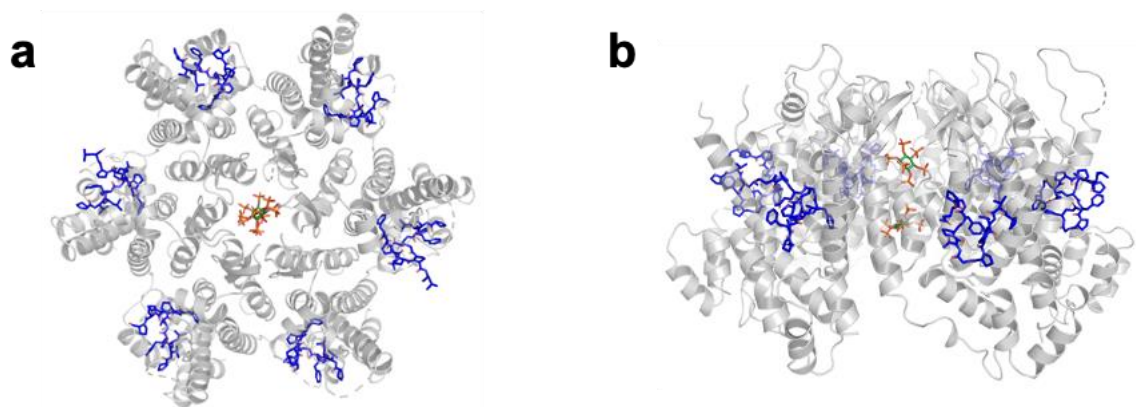

**Supplementary Figure 12. The crystal structure of cross-linked CA hexamer in complex with IP6 and CPSF<sub>6313-327</sub> peptide.** Top (a) and side (b) views of the 2.81 Å resolution crystal structure of cross-linked CA<sub>A14C/E45C/W184A/M185A</sub> hexamer (grey) in complex with IP6 (green) and CPSF<sub>6313-327</sub> (blue) (PDB: 7SNQ). Within the structure, the CPSF<sub>6313-327</sub> peptide engages with two adjacent CA subunits with a stoichiometry of six CPSF<sub>6313-327</sub> molecules per CA hexamer and two IP6 molecules bound near the ring of Arg18 and Lys25 residues per CA hexamer. Our crystal structure of the tripartite complex exhibits similarities with the published structures of CA hexamer + IP6 and CA hexamer + CPSF<sub>6313-327</sub><sup>1-4</sup>. In common with the CA hexamer + IP6 structure<sup>1</sup>, we observed that two IP6 molecules per CA hexamer were accommodated at nearly the same locations within the tripartite complex<sup>1,2</sup>. We also observed variations between the published CA hexamer + IP6 and our tripartite complex structures in positioning of CA residues 177-185, likely due to bound CPSF<sub>6313-327</sub> influencing the latter structure<sup>1</sup>. Similarly to reported CA hexamer + CPSF<sub>6313-327</sub> peptide structures<sup>4</sup>, we observed that in the tripartite complex CPSF<sub>6313-327</sub> engages two adjacent CA subunits by interacting with the N-terminal hydrophobic pocket of one subunit and C-terminal Gln179 and Lys182 residues of the adjoining subunit.

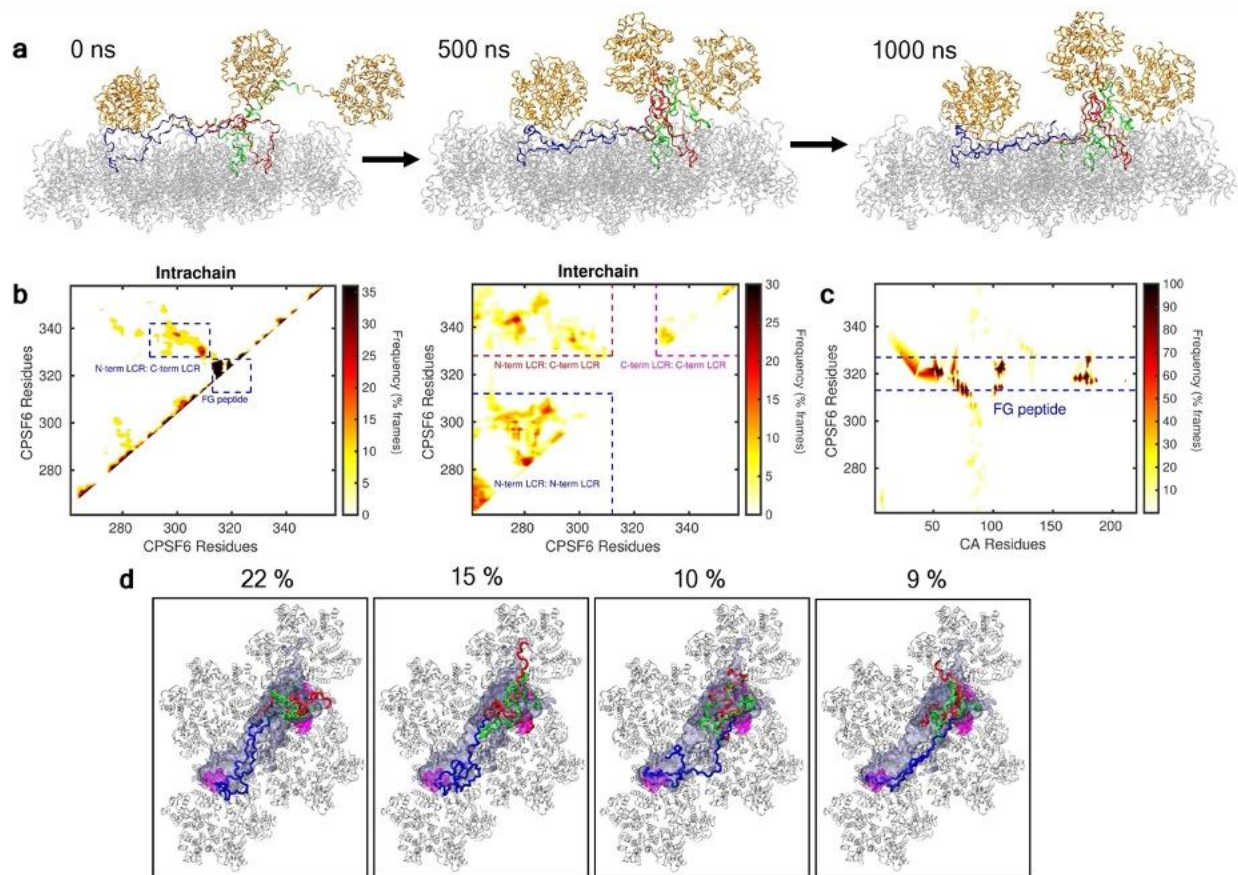

**Supplementary Figure 13. AA MD simulations of CPSF6 assembly templated by CA hexamer lattice.** (a) Initial model (left panel) of the GST-CPSF6<sub>261-358</sub> bound to the CA hexamer lattice. The center and right panels show the snapshot of the system at halfway (500 ns) and end (1000 ns) of the simulation trajectory. The CA hexamer and GST dimer is shown in silver and orange ribbons, respectively. The three CPSF6 chains are colored in blue, green, and red ribbons. (b) Time-averaged intrachain and interchain residue-residue contact map of the CPSF6 polypeptides. In the intrachain contact map, key contacts between the FG peptide residues, and N-terminal LCR and C-terminal LCR are highlighted. The interactions between the N-terminal LCR, N-terminal and C-terminal LCR, and C-terminal LCR segments are highlighted in the interchain contact maps. (c) Time-averaged residue-residue contact map between CPSF6 chains and CA hexamer lattice. The region bound by the dotted line highlights the interactions of the FG peptide with the CA residues. (d) The time-averaged density of the LCR fragment of the tri-CPSF6 complex (shown as faded blue surface) is overlaid onto the 4 CA hexamer lattice (shown in silver ribbons). The time-averaged density of the FG peptide for each CPSF6 chain is shown in solid magenta wireframe. The polypeptide densities are contoured at  $r = 0.01$  and  $0.005$  for LCR and FG, respectively. Finally, the top four conformational clusters of the tri-CPSF6 complex are shown superimposed onto the 4 CA hexamer lattice, LCR, and FG peptide density. The title of each snapshot represents the percentage of simulation frames where the conformational clusters were observed.



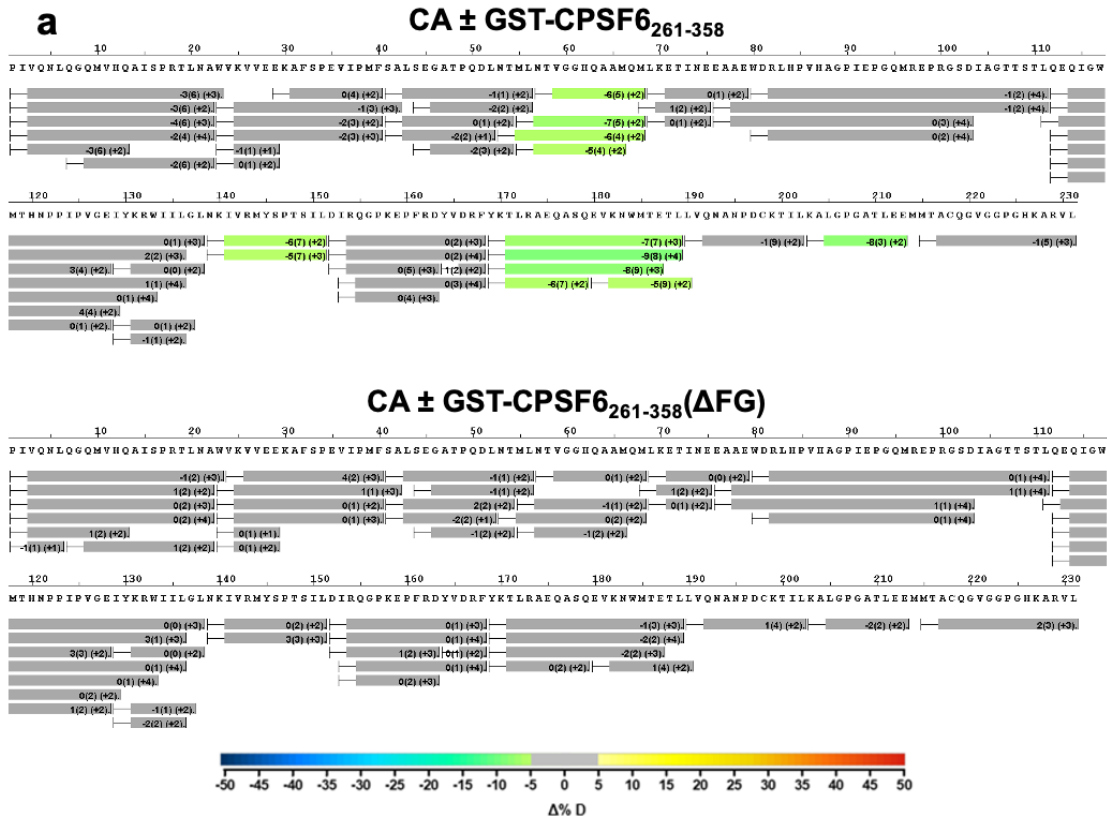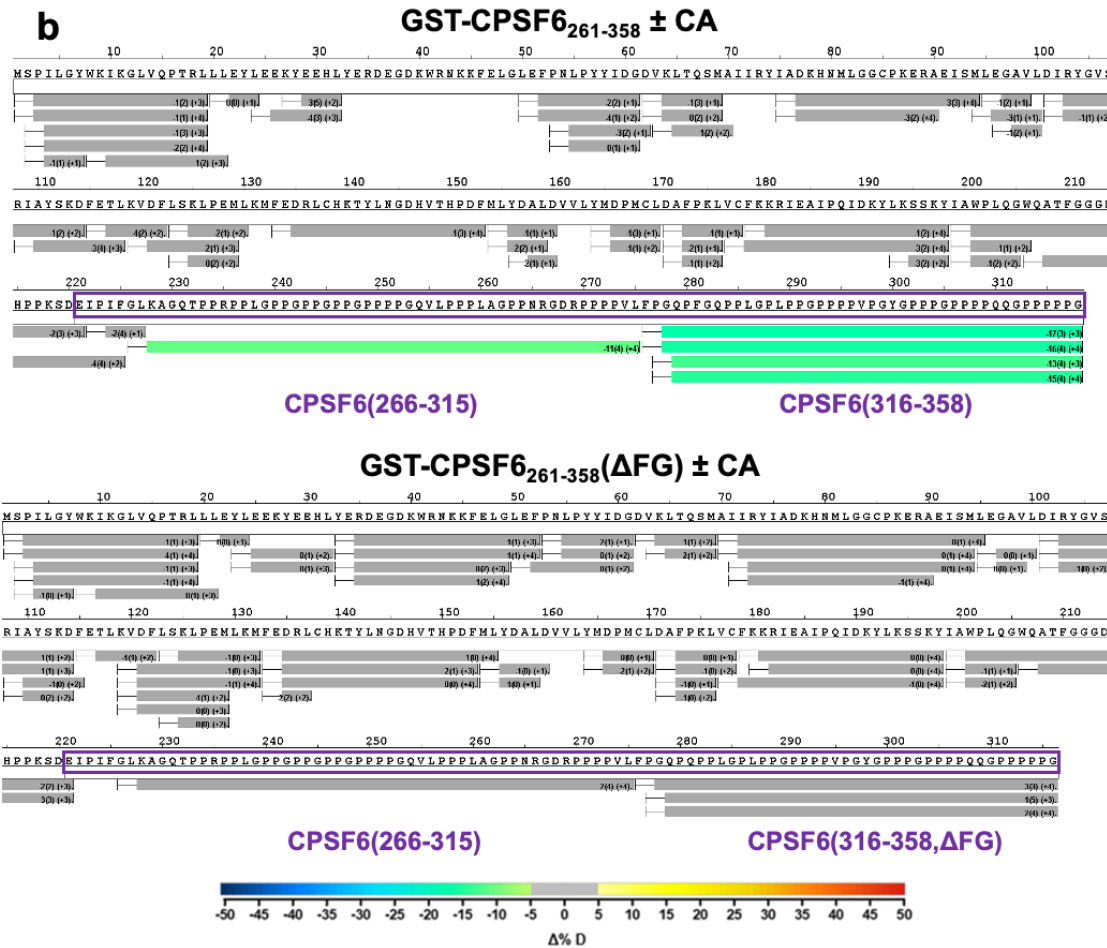

**Supplementary Figure 14. Consolidated HDX-MS results.** (a) Comparing protection in IP6 stabilized CA tubes upon addition of GST-CPSF<sub>6261-358</sub> vs GST-CPSF<sub>6261-358</sub>(ΔFG). Detected peptide fragments from HIV-1 CA are shown under respective amino acid sequences. Coloring corresponds to HDX protection levels indicated by the heat map (gray: no protection; cold colors: protection; warm colors: deprotection). (b) Comparing protection in GST-CPSF<sub>6261-358</sub> vs CPSF<sub>6261-358</sub>(ΔFG) upon addition of IP6-stabilized CA tubes. Detected peptide fragments from GST-CPSF<sub>6261-358</sub> and GST-CPSF<sub>6261-358</sub>(ΔFG) are shown under respective amino acid sequences. Coloring corresponds to HDX protection levels indicated by the heat map (gray: no protection; cold colors: protection; warm colors: deprotection). The amino acid sequences corresponding to CPSF<sub>6261-358</sub> and CPSF<sub>6261-358</sub>(ΔFG) are indicated by purple boxes. The amino acid numbering above indicated sequences corresponds to their positioning within the recombinant GST-CPSF<sub>6261-358</sub>. GST-CPSF<sub>6261-358</sub> and GST-CPSF<sub>6261-358</sub>(ΔFG) proteins analyzed. Numbering corresponding to CPSF6 sequences are indicated in purple under the detected peptide fragments.

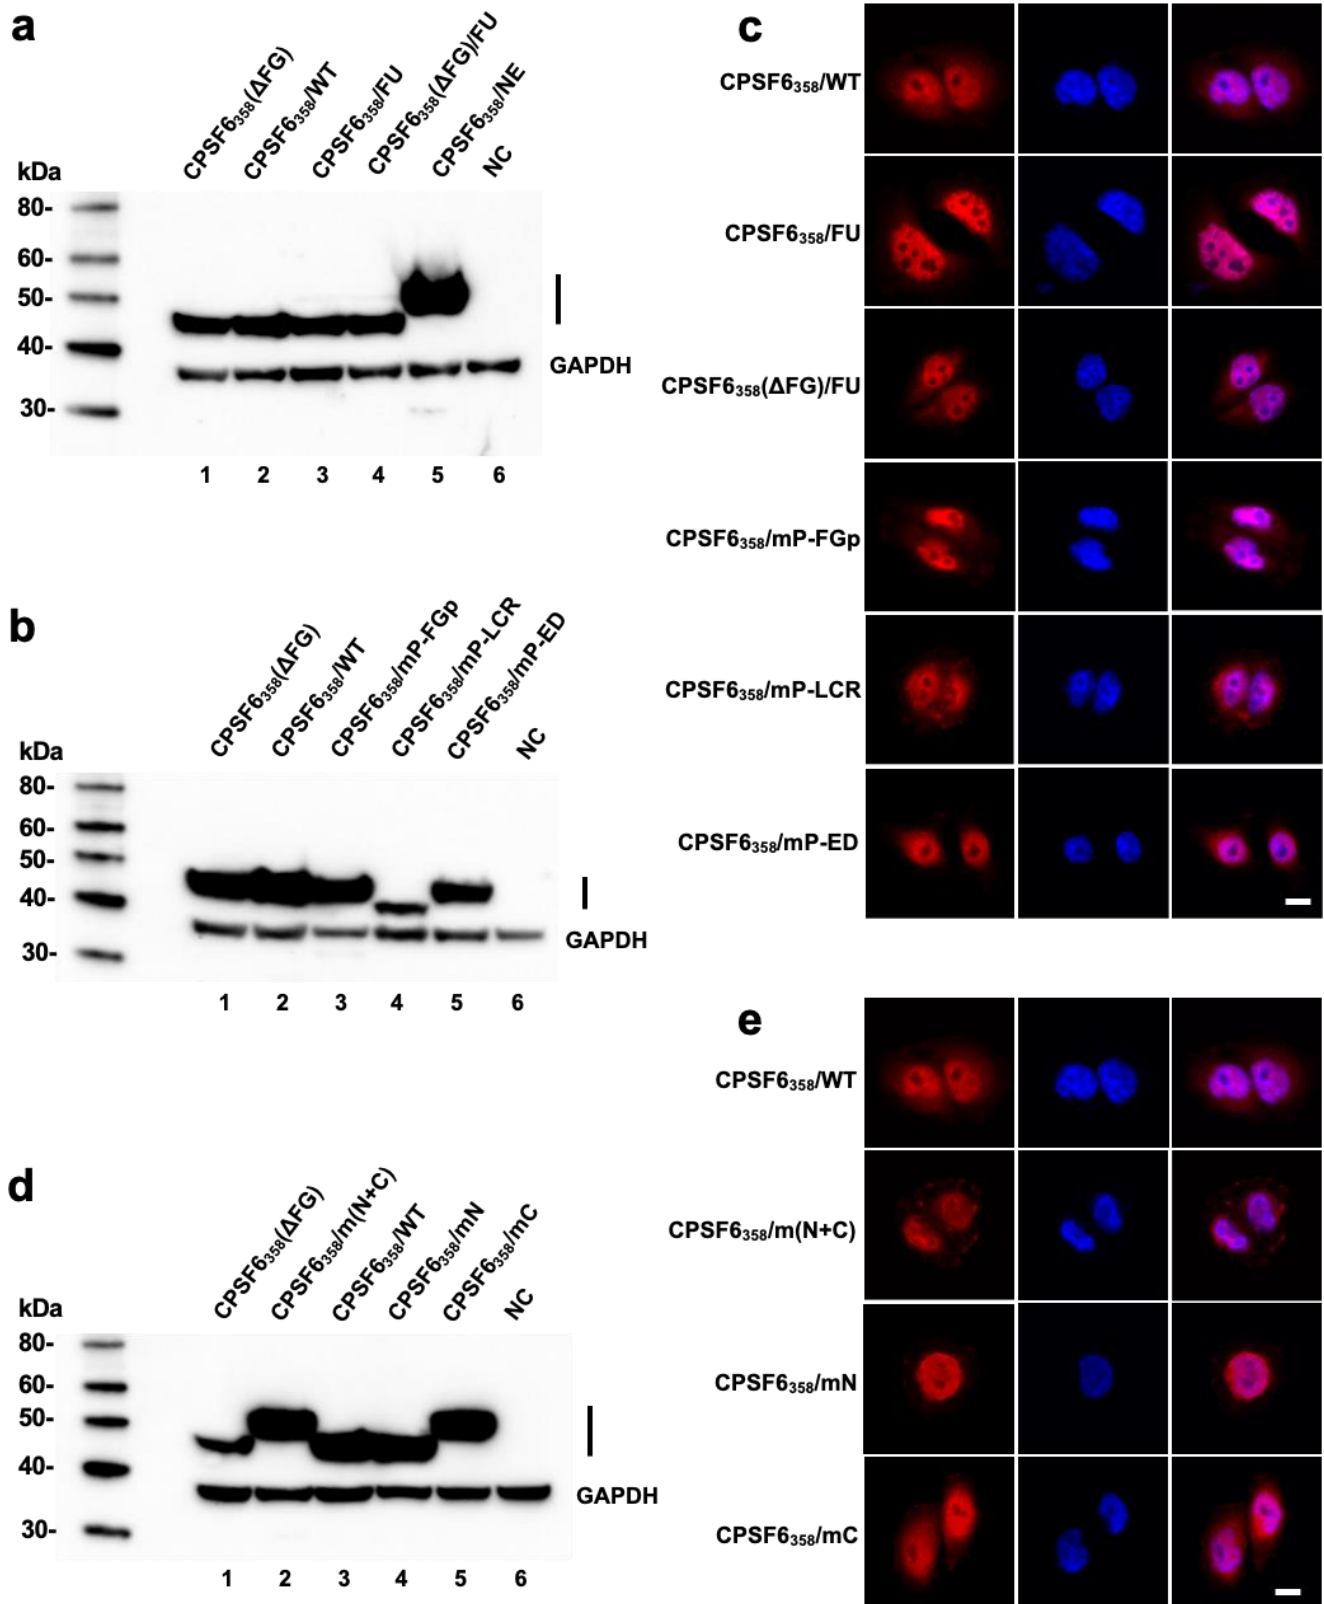

**Supplementary Figure 15. Probing roles of CPSF6 LCRs.** (a, b) Representative immunoblotting to show the expression of CPSF6<sub>358</sub> and mutant proteins used in Fig. 7. (c) Immunofluorescence to detect the CPSF6<sub>358</sub> and mutant proteins used in Fig. 7. HeLa cells were immunostained for HA-tagged protein (red) and nuclei DAPI (blue). Scale bar is 5 μm. (d) Representative immunoblotting to show the expression of WT CPSF6<sub>358</sub> and related mutant proteins used in Fig. 8. Expression of target proteins are indicated by a side bar. (e) Immunofluorescence to detect

the WT CPSF6<sub>358</sub> and related mutant proteins used in Fig. 8. HeLa cells were immunostained for HA-tagged protein (red) and nuclei DAPI (blue). Scale bar is 5  $\mu$ m. All the experiments were repeated 3 times independently with similar results. Abbreviation: FU: FUS, NE: NEURM, CKO: CPSF6 knock-out, LCR: low complexity region, a.u.:arbitrary units

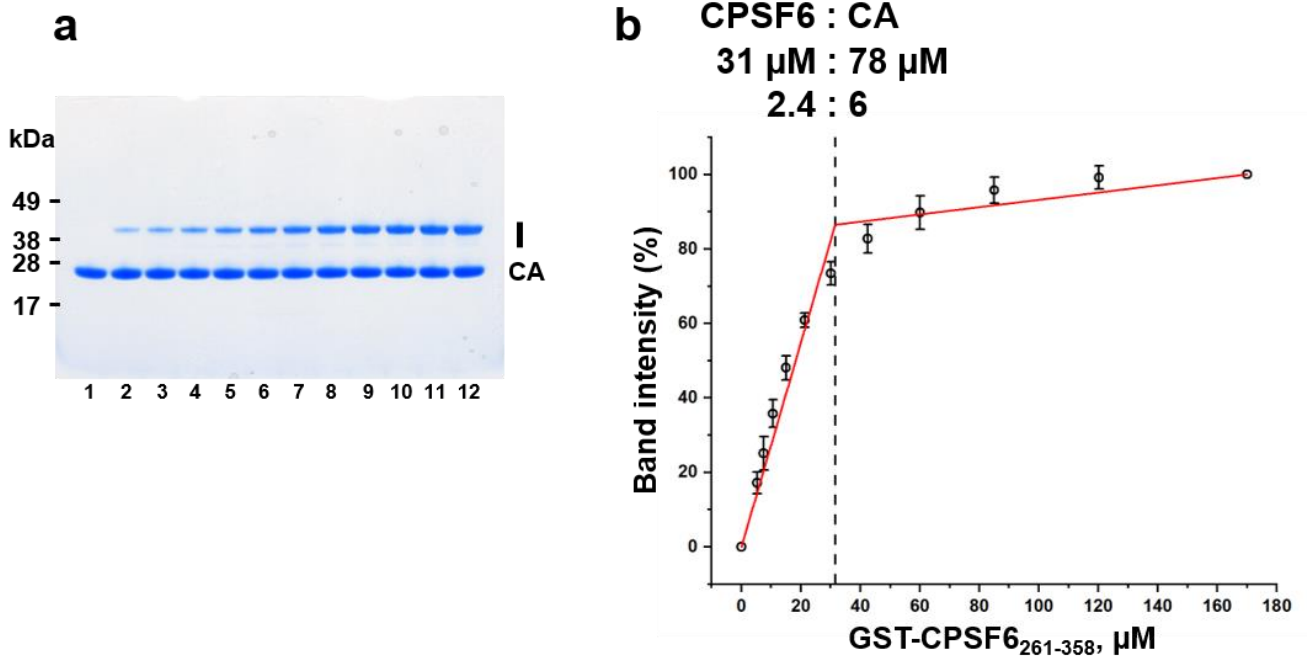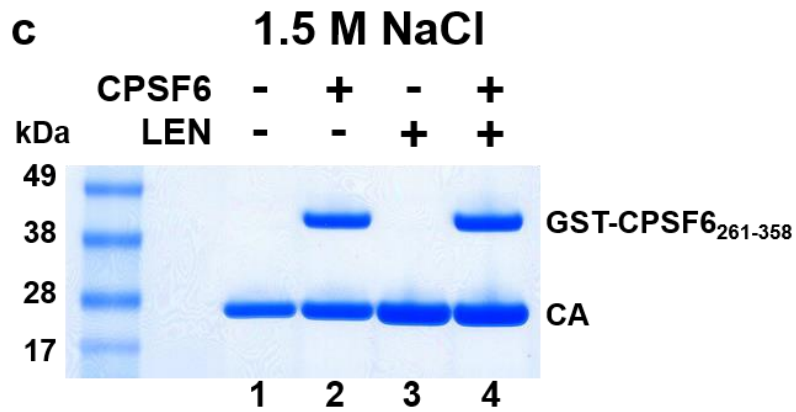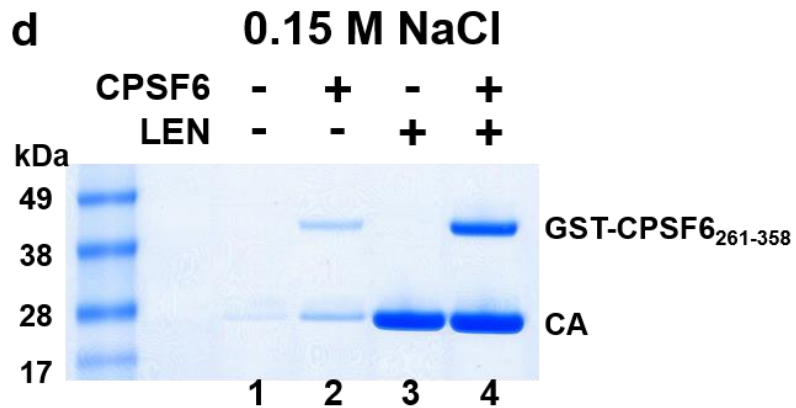

**Supplementary Figure 16. Biochemical analysis of CPSF6 and LEN interactions with CA nanotubes. (a,b)** Quantitative analysis of GST-CPSF6<sub>261-358</sub> binding to CA tubes. (a) Representative SDS-PAGE image. Pre-formed

CA nanotubes (78  $\mu\text{M}$ ) were incubated with indicated concentrations of GST-CPSF<sub>261-358</sub>. **(b)** Quantification of results in **(a)**. The averaged data ( $\pm$  SD) from three independent experiments are shown. Source data are provided as a Source Data file. **(c)** CA nanotubes were assembled in 1.5 M NaCl, incubated in the absence (lane 1) or presence of GST-CPSF<sub>261-358</sub> (lane 2) and then pelleted. LEN was added to CA nanotubes or CA nanotubes + GST-CPSF<sub>261-358</sub> and then pelleted. **(d)** Lanes 1 and 2: CA nanotubes were assembled in 1.5 M NaCl, incubated in the absence or presence of GST-CPSF<sub>261-358</sub> (similarly to lanes 1 and 2 shown above in **(c)**), pelleted, then re-suspended in the 0.15 M NaCl containing buffer followed by pelleting. Lanes 3 and 4: CA nanotubes were assembled in 1.5 M NaCl, incubated in the absence or presence of GST-CPSF<sub>261-358</sub> (similarly to lanes 3 and 4 shown above in **(c)**), pelleted, then re-suspended in the 0.15 M NaCl containing buffer followed by pelleting. Equimolar concentrations (50  $\mu\text{M}$ ) of CA, GST-CPSF<sub>261-358</sub> and LEN were used in **c** and **d**. Representative SDS-PAGE images of pelleted fractions of five independent experiments are shown. Abbreviation: LEN: lenacapavir.

**Supplementary Table 1. Binding affinity of CPSF6<sub>313-327</sub>, NUP153<sub>1409-1423</sub>, and SEC24C<sub>228-242</sub> peptides to cross-linked CA hexamer.**

| <b>Peptides</b>             | <b><math>K_d</math> (<math>\mu</math>M)</b> |
|-----------------------------|---------------------------------------------|
| CPSF6 <sub>313-327</sub>    | 70.9 $\pm$ 2.5                              |
| NUP153 <sub>1409-1423</sub> | 131 $\pm$ 13                                |
| SEC24C <sub>228-242</sub>   | 1070 $\pm$ 101                              |

Supplementary Table 2. Integration site numbers and distributions with respect to SPADs, average gene number/Mb, LADs, and Refseq genes.

| Genotype       | Total Integration Sites | SPADs (%)                                         | Avg. Gene number/Mb                            | LAD (%)                                         | RefSeq (%)                                     |
|----------------|-------------------------|---------------------------------------------------|------------------------------------------------|-------------------------------------------------|------------------------------------------------|
| CKO            | 4,191                   | 1.0<br><i>p</i> =1.6E-200*<br><i>p</i> =1.2E-16** | 6.6<br><i>p</i> =2.8E-267<br><i>p</i> =9.1E-15 | 58.9<br><i>p</i> =4.2E-165<br><i>p</i> =9.0E-23 | 60.3<br><i>p</i> =4.6E-51<br><i>p</i> =2.5E-83 |
| CKO + CPSF6/WT | 4,476                   | 18.7<br><i>p</i> <E-300                           | 15.4<br><i>p</i> <E-300                        | 29.9<br><i>p</i> =1.8E-176                      | 75.3<br><i>p</i> <E-300                        |
| CKO + CPSF6/AD | 5,910                   | 1.3<br><i>p</i> =1.7E-231<br><i>p</i> =6.4E-15    | 6.5<br><i>p</i> <E-300<br><i>p</i> =2.5E-28    | 59<br><i>p</i> =2.9E-194<br><i>p</i> =1.0E-31   | 57.4<br><i>p</i> =6.8E-81<br><i>p</i> =2.1E-77 |
| CKO + CPSF6/NE | 51,933                  | 0.5<br><i>p</i> <E-300<br><i>p</i> =1.5E-257      | 6.4<br><i>p</i> <E-300<br><i>p</i> =1.8E-127   | 60.2<br><i>p</i> <E-300<br><i>p</i> =4.4E-258   | 62.0<br><i>p</i> =6.3E-75<br><i>p</i> <E-300   |
| CKO + CPSF6/FU | 3,918                   | 21.9<br><i>p</i> =2.9E-04<br><i>p</i> <E-300      | 17.4<br><i>p</i> =1.8E-15<br><i>p</i> <E-300   | 22.8<br><i>p</i> =1.2E-13<br><i>p</i> =8.7E-283 | 79.2<br><i>p</i> =3.5E-05<br><i>p</i> <E-300   |
| CKO + CPSF6/CD | 24,140                  | 17.9<br><i>p</i> =4.1E-01<br><i>p</i> <E-300      | 15.1<br><i>p</i> =6.7E-02<br><i>p</i> <E-300   | 29<br><i>p</i> =7.1E-01<br><i>p</i> <E-300      | 77.3<br><i>p</i> =1.9E-06<br><i>p</i> <E-300   |
| RIC            | 112,183                 | 2.8                                               | 7.9                                            | 51.2                                            | 45.1                                           |

P values were calculated by two-sided Fisher's exact test or by two-sided Wilcoxon-Mann-Whitney rank sum test (for gene density). No adjustment was made for multiple comparison.

\* P values in blue indicate differences compared to CPSF6/WT control.

\*\* P values in black indicate differences compared to RIC.



**Supplementary Table 3. Cryo-EM data collection statistics.**

|                                                                         | CA+IP6+<br>GST-CPSF6<br>EMD-27617 | CA+IP6+<br>GST-CPSF6<br>EMD-27619 | CA+IP6+<br>GST-CPSF6( $\Delta$ FG)<br>EMD-27625 |
|-------------------------------------------------------------------------|-----------------------------------|-----------------------------------|-------------------------------------------------|
| Data collection and processing:                                         | Symmetry 1                        | Symmetry 2                        |                                                 |
| Microscope                                                              | Arctica<br>(ThermoFisher)         | Arctica<br>(ThermoFisher)         | Arctica<br>(ThermoFisher)                       |
| Voltage (keV)                                                           | 200                               | 200                               | 200                                             |
| Camera                                                                  | K3 Summit (Gatan)                 | K3 Summit (Gatan)                 | K3 Summit (Gatan)                               |
| Magnification                                                           | 28,000 X                          | 28,000 X                          | 28,000 X                                        |
| Pixel size at detector ( $\text{\AA}/\text{pixel}$ )                    | 1.4                               | 1.4                               | 1.4                                             |
| Total electron exposure ( $e^-/\text{\AA}^2$ )                          | 45.65                             | 45.65                             | 46.15                                           |
| Exposure rate ( $e^-/\text{pixel}/\text{sec}$ )                         | 29.829                            | 29.829                            | 30.153                                          |
| Number of frames collected during exposure                              | 40                                | 40                                | 40                                              |
| Defocus range ( $\mu\text{m}$ )                                         | 1.5-2.5                           | 1.5-2.5                           | 1.5-2.5                                         |
| Micrographs collected (no.)                                             | 4,706                             | 4,706                             | 2,157                                           |
| Micrographs used (no.)                                                  | 530                               | 569                               | 491                                             |
| Total extracted tube segments (no.)                                     | 236,974                           | 236,974                           | 109,696                                         |
| Reconstruction:                                                         |                                   |                                   |                                                 |
| Refined particles (no.)                                                 | 5,894                             | 6,212                             | 3,023                                           |
| Final particles (no.)                                                   | 5,894                             | 6,212                             | 3,023                                           |
| Helical symmetry parameters (twist ( $^\circ$ ), rise ( $\text{\AA}$ )) | -55.2834, 7.12159                 | 138.157, 7.06355                  | 82.5822, 6.95455                                |
| Resolution (global, $\text{\AA}$ )                                      | 7.9                               | 7.4                               | 7.0                                             |
| FSC 0.143 (masked)                                                      | 7.9                               | 7.4                               | 7.0                                             |
| Map sharpening B factor ( $\text{\AA}^2$ )/(B factor Range)             | -614                              | -544                              | -385                                            |
| Map sharpening method                                                   | Relion postprocess                | Relion postprocess                | Relion postprocess                              |

**Supplementary Table 4. Summary of X-ray data collection and refinement statistics.**

---

|                                                   |                                                                |
|---------------------------------------------------|----------------------------------------------------------------|
|                                                   | CA <sub>hex</sub> + IP <sub>6</sub> + CPSF6 <sub>313-327</sub> |
|                                                   | PDB ID: 7SNQ                                                   |
| <hr/>                                             |                                                                |
| <b>Data collection</b>                            |                                                                |
| X-ray Source                                      | ALS 4.2.2                                                      |
| Software                                          | XDS                                                            |
| Wavelength                                        | 1.0000 Å                                                       |
| Space group                                       | P 2 <sub>1</sub> 2 <sub>1</sub> 2 <sub>1</sub>                 |
| Unit cell dimensions                              |                                                                |
| <i>a</i> , <i>b</i> , <i>c</i> (Å)                | 133.92, 135.67, 212.88                                         |
| α, β, γ (°)                                       | 90, 90, 90                                                     |
| Resolution (Å)                                    | 45.22 – 2.81 (2.86-2.81)                                       |
| No. total reflections                             | 611,743 (26,623)                                               |
| No. unique reflections                            | 94,907 (4,661)                                                 |
| <i>R</i> <sub>merge</sub>                         | 0.083 (1.191)                                                  |
| CC1/2                                             | 0.999 (0.576)                                                  |
| <i>I</i> / σ <i>I</i>                             | 16.5 (1.4)                                                     |
| Completeness (%)                                  | 99.9 (100)                                                     |
| Redundancy                                        | 6.4 (6.1)                                                      |
| <br>                                              |                                                                |
| <b>Refinement</b>                                 |                                                                |
| Resolution (Å)                                    | 44.24 – 2.81 (2.91–2.81)                                       |
| No. reflections used in refinement                | 94,235 (9,361)                                                 |
| No. reflections used for <i>R</i> <sub>free</sub> | 4,738 (465)                                                    |
| <i>R</i> <sub>work</sub> (%)                      | 22.90 (33.03)                                                  |
| <i>R</i> <sub>free</sub> (%)                      | 28.18 (38.48)                                                  |
| No. non-hydrogen atoms                            | 20,569                                                         |
| Protein                                           | 20,252                                                         |
| Ligand/ion                                        | 146                                                            |
| Water                                             | 171                                                            |
| Wilson B-factor                                   | 69.97                                                          |
| Average B-factors                                 | 85.16                                                          |
| Protein                                           | 84.78                                                          |
| Ligands/ions                                      | 163.77                                                         |
| Waters                                            | 62.15                                                          |
| R.m.s. deviations                                 |                                                                |
| Bond lengths (Å)                                  | 0.009                                                          |
| Bond angles (°)                                   | 1.09                                                           |
| Ramachandran                                      |                                                                |
| Favored (%)                                       | 97.54                                                          |
| Allowed (%)                                       | 2.46                                                           |
| Outliers (%)                                      | 0                                                              |
| Rotamer outliers (%)                              | 0.28                                                           |
| Clashscore                                        | 7.60                                                           |

---

The values in parentheses indicate the highest resolution shell.

**Supplementary Table 5. HDX-MS experimental conditions and data analysis parameters from the guidelines of the IC-HDX-MS community.**

|                                                    |                                                                                           |
|----------------------------------------------------|-------------------------------------------------------------------------------------------|
| <b>Data set for Fig 6 and Supplementary Fig 14</b> | <b>GST-CPSF6<sub>261-358</sub> in the presence of CA(A92E)</b>                            |
| HDX reaction details                               | 100 mM MOPS, 1 M NaCl, 200 $\mu$ M IP6, pH = 6.5, 2min, 25 °C                             |
| HDX quench reaction details                        | 0.1 M Na Phosphate, 50 mM TCEP, pH = 2.0, 4 °C                                            |
| HDX time course (sec)                              | 10 and 30                                                                                 |
| Back-exchange                                      | estimated from input recovery estimate of 0.7 and deuterium solution concentration of 0.8 |
| # of Peptides                                      | 50                                                                                        |
| Sequence coverage                                  | 92 %                                                                                      |
| Average peptide length / Redundancy                | 5 / 2.414                                                                                 |
| Replicates (biological or technical)               | 2 biological replicates with 3 technical replicates each                                  |
| Repeatability                                      | 2.730739 (average STD)                                                                    |
| Significant differences in HDX                     | > 5 %D (unpaired t-tests at each time point, p-value < 0.01)                              |
| <b>Data set for Fig 6 and Supplementary Fig 14</b> | <b>GST-CPSF6<sub>261-358</sub>(<math>\Delta</math>FG) in the presence of CA(A92E)</b>     |
| HDX reaction details                               | 100 mM MOPS, 1 M NaCl, 200 $\mu$ M IP6, pH = 6.5, 2min, 25 °C                             |
| HDX quench reaction details                        | 0.1 M Na Phosphate, 50 mM TCEP, pH = 2.0, 4 °C                                            |
| HDX time course (sec)                              | 10 and 30                                                                                 |
| Back-exchange                                      | estimated from input recovery estimate of 0.7 and deuterium solution concentration of 0.8 |
| # of Peptides                                      | 59                                                                                        |
| Sequence coverage                                  | 98%                                                                                       |
| Average peptide length / Redundancy                | 12 / 2.845                                                                                |
| Replicates (biological or technical)               | 2 biological replicates with 3 technical replicates each                                  |
| Repeatability                                      | 1.298794 (average STD)                                                                    |
| Significant differences in HDX                     | > 5 %D (unpaired t-tests at each time point, p-value < 0.01)                              |
| <b>Data set for Fig 6 and Supplementary Fig 14</b> | <b>CA(A92E) in the presence of GST-CPSF6<sub>261-358</sub></b>                            |
| HDX reaction details                               | 100 mM MOPS, 1 M NaCl, 200 $\mu$ M IP6, pH = 6.5, 2min, 25 °C                             |
| HDX quench reaction details                        | 0.1 M Na Phosphate, 50 mM TCEP, pH = 2.0, 4 °C                                            |
| HDX time course (sec)                              | 10, 30, 60, 900, 3600                                                                     |
| Back-exchange                                      | estimated from input recovery estimate of 0.7 and deuterium solution concentration of 0.8 |
| # of Peptides                                      | 54                                                                                        |
| Sequence coverage                                  | 99%                                                                                       |
| Average peptide length / Redundancy                | 8 / 3.796                                                                                 |
| Replicates (biological or technical)               | 2 biological replicates with 3 technical replicates each                                  |
| Repeatability                                      | 5.081573 (average STD)                                                                    |
| Significant differences in HDX                     | > 5 %D (unpaired t-tests at each time point, p-value < 0.01)                              |
| <b>Data set for Fig 6 and Supplementary Fig 14</b> | <b>CA(A92E) in the presence of GST-CPSF6<sub>261-358</sub>(<math>\Delta</math>FG)</b>     |
| HDX reaction details                               | 100 mM MOPS, 1 M NaCl, 200 $\mu$ M IP6, pH = 6.5, 2min, 25 °C                             |
| HDX quench reaction details                        | 0.1 M Na Phosphate, 50 mM TCEP, pH = 2.0, 4 °C                                            |
| HDX time course (sec)                              | 10, 30, 60, 900, 3600                                                                     |
| Back-exchange                                      | estimated from input recovery estimate of 0.7 and deuterium solution concentration of 0.8 |
| # of Peptides                                      | 54                                                                                        |
| Sequence coverage                                  | 99%                                                                                       |
| Average peptide length / Redundancy                | 8 / 3.817                                                                                 |
| Replicates (biological or technical)               | 2 biological replicates with 3 technical replicates each                                  |
| Repeatability                                      | 2.222696 (average STD)                                                                    |
| Significant differences in HDX                     | > 5 %D (unpaired t-tests at each time point, p-value < 0.01)                              |

**Supplementary Table 6. Sequences of the primers used for cloning.**

| PRIMER NAME         | SEQUENCE (5' TO 3')                                                                   |
|---------------------|---------------------------------------------------------------------------------------|
| TSIN-CPSF6-F        | CTCCATAGAAGACACCGACTCTAGAGGATCCATGGCGGACGGCGTGGACCAC                                  |
| TSIN-CPSF6-R        | AGGTACCGGGCCCCCCTCGAGGTTAAGCGTAATCTGGAACATCGTATGGGTA<br>GCCTGGAGGTGGAGGTGGTCC         |
| TSIN-FUS-R          | ACTCTAGAGGTACCGGGCCCCCCTCGAGGTTAAGCGTAATCTGGAACATCGT<br>ATGGGTAAGAACTGCTACCGTAACTTCC  |
| TSIN-ADD2-R         | ACTCTAGAGGTACCGGGCCCCCCTCGAGGTTAAGCGTAATCTGGAACATCGT<br>ATGGGTAGAGGATTTCTCTGCCGTCTG   |
| TSIN-NEURM-R        | ACTCTAGAGGTACCGGGCCCCCCTCGAGGTTAAGCGTAATCTGGAACATCGT<br>ATGGGTAGGCACTTTCTGTCTCAGCTGAG |
| TSIN-C13-1R         | GATCTCCTCGATTAGGAGGCCCGGGCTCATCAGGCTTGGAGCC                                           |
| TSIN-C13-2F         | GGCTCCAAGCCTGATGAGCCCGGGCCTCCTAATCGAGGAGATC                                           |
| TSIN-C14-1R         | GAGGAGGCAGAACCTGACCAGGGGCTGCTTCGGCAGTAGTGGTG                                          |
| TSIN-C14-2F         | CACCACTACTGCCAAGCAGCCCCTGGTCAGGTTCTGCCTCCTC                                           |
| TSIN-C15-1R         | GAGGAGGCAGAACCTGACCAGGCTCTATGCTGTGCCCCATATG                                           |
| TSIN-C15-2F         | CATATGGGGCACAGCATAGAGCCTGGTCAGGTTCTGCCTCCTC                                           |
| TSIN-C15-2R         | ACTCTAGAGGTACCGGGCCCCCCTCGAGGTTAAGCGTAATCTGGAACATCGT<br>ATGGGTAACCCAATGGAGGCTGCCCAAAG |
| TSIN-C16-1R         | GAGGAGGGGACTGAGTGGCCAAAGGTGGAGGACCTGGTGGACC                                           |
| TSIN-C16-2F         | CCACCTTTGGCCACTCAGTCCCCTCCTCCTCTAGCTGGGCCTC                                           |
| TSIN-C17-1R         | GGAGGCCCGGACTGAGTGGCCAAACAGAACCTGACCAGGAGGTGGAG                                       |
| TSIN-C17-2F         | CAGGTTCTGTTGGCCACTCAGTCCGGGCCTCCTAATCGAGGAGATC                                        |
| TSIN-C18-1R         | TCTCCGACTGAGTGGCCAAAGCTAGAGGAGGAGGCAGAAC                                              |
| TSIN-C18-2F         | TCTAGCTTTGGCCACTCAGTCCGGAGATCGCCCTCCACCACCAG                                          |
| TSIN-C19-1R         | CTGGGTAGGACTGAGTGGCCAATCGATTAGGAGGCCAGCTAG                                            |
| TSIN-C19-2F         | ATCGATTGGCCACTCAGTCCACCCAGTTCTTTTTCTGGACAAC                                           |
| TSIN-C20-1R         | AGAGCTCCCAGCTAGAGAAGAGCTCAGAACCTGACCGCTAGGTGGAGGACCT<br>GGTGGACC                      |
| TSIN-C20-2F         | GAGCTCTTCTCTAGCTGGGAGCTCTAATCGAGGAGATCGCAGCTCTAGCGTTC<br>TTTTCTGGACAACCTTTTG          |
| TSIN-C21-1R         | GCTAGGAGGGCTATAGCTAGGAGGAGGATAGCTATAGCTAGGAGGTGGAGGA<br>CCTGGTGGAC                    |
| TSIN-C21-2F         | CCTCCTCCTAGCTATAGCCCTCCTAGCTATAGCTATAGCCCTCCACCACCAGTT<br>CTTTTTCTGGACAAC             |
| TSIN-DELTA<br>FG-1R | GAAGTGGACCCAATGGAGGCTGAGGTTGTCCAGGAAAAGAACTG                                          |
| TSIN-DELTA<br>FG-2F | CAGTTCTTTTTCTGGACAACCTCAGCCTCCATTGGGTCCACTTCCTC                                       |
| TSIN-C23-1R         | AAATGGATATTTCTCTATGCTGTGCCCCATATGC                                                    |
| TSIN-C23-2F         | GCACAGCATAGAGGAAATATCCATTTTTGGCCTAAAAG                                                |
| TSIN-C23-2R         | CGACTCTAGAGGTACCGGGCCCCCCTCGAGGTTAAGCGTAATCTGGAACATC<br>GTATG                         |
| TSIN-C24-1R         | AAAATGTCTATTTCTCTATGCTGTGCCCCATATGC                                                   |

### Supplementary References:

- 1 Dick, R. A. *et al.* Inositol phosphates are assembly co-factors for HIV-1. *Nature* **560**, 509-512, doi:10.1038/s41586-018-0396-4 (2018).
- 2 Mallery, D. L. *et al.* IP6 is an HIV pocket factor that prevents capsid collapse and promotes DNA synthesis. *Elife* **7**, doi:10.7554/eLife.35335 (2018).
- 3 Bhattacharya, A. *et al.* Structural basis of HIV-1 capsid recognition by PF74 and CPSF6. *Proc Natl Acad Sci U S A* **111**, 18625-18630, doi:10.1073/pnas.1419945112 (2014).
- 4 Price, A. J. *et al.* Host cofactors and pharmacologic ligands share an essential interface in HIV-1 capsid that is lost upon disassembly. *PLoS Pathog* **10**, e1004459, doi:10.1371/journal.ppat.1004459 (2014).
