# Supplementary material for: Prion-like low complexity regions enable avid virus-host interactions during HIV-1 infection
Source: PubMed Central journal article supplement (PMC9537594; doi:10.1038/s41467-022-33662-6), 2022-10-06
Supplement: 41467_2022_33662_MOESM2_ESM.pdf [file 41467_2022_33662_MOESM2_ESM.pdf]

## Reporting Summary

Nature Portfolio wishes to improve the reproducibility of the work that we publish. This form provides structure for consistency and transparency in reporting. For further information on Nature Portfolio policies, see our [Editorial Policies](#) and the [Editorial Policy Checklist](#).

### Statistics

For all statistical analyses, confirm that the following items are present in the figure legend, table legend, main text, or Methods section.

n/a Confirmed

- The exact sample size ( $n$ ) for each experimental group/condition, given as a discrete number and unit of measurement
- A statement on whether measurements were taken from distinct samples or whether the same sample was measured repeatedly
- The statistical test(s) used AND whether they are one- or two-sided  
*Only common tests should be described solely by name; describe more complex techniques in the Methods section.*
- A description of all covariates tested
- A description of any assumptions or corrections, such as tests of normality and adjustment for multiple comparisons
- A full description of the statistical parameters including central tendency (e.g. means) or other basic estimates (e.g. regression coefficient) AND variation (e.g. standard deviation) or associated estimates of uncertainty (e.g. confidence intervals)
- For null hypothesis testing, the test statistic (e.g.  $F$ ,  $t$ ,  $r$ ) with confidence intervals, effect sizes, degrees of freedom and  $P$  value noted  
*Give  $P$  values as exact values whenever suitable.*
- For Bayesian analysis, information on the choice of priors and Markov chain Monte Carlo settings
- For hierarchical and complex designs, identification of the appropriate level for tests and full reporting of outcomes
- Estimates of effect sizes (e.g. Cohen's  $d$ , Pearson's  $r$ ), indicating how they were calculated

*Our web collection on [statistics for biologists](#) contains articles on many of the points above.*

### Software and code

Policy information about [availability of computer code](#)

#### Data collection

Carl Zeiss MicroImaging Zen software Black Version (2.3 SP1) was used to acquire fluorescent images  
XDS Suite Build 20190315 was used to collect and process x-ray crystallographic data  
Relion 3.1.2 was used to collect Cryo-EM data.  
HDX Data was collected on a Q Exactive mass spectrometer from ThermoFisher using Xcalibur Software (2.2 SP1.48) from ThermoFisher

#### Data analysis

ICY Image analysis software (2.0.2.0) was used to determine amounts of PLA puncta in cells  
Enspire manager (3.10.3005.1440) was used to analyze protein concentrations  
Nanodrop-1000 (v3.8.1) was used to analyze DNA concentrations  
Phaser and phenix.refine within Phenix Suite build 1.15.2-3472 were utilized for molecular replacement and x-ray crystal structure refinement, respectively.  
Coot build 0.8.9.2 was used for manual refinement of the x-ray crystal structure  
Origin 2019 (9.6) software was used to analyze EC50 value  
Integration sites were analyzed by BEDtools (2.30.0)  
Surface Plasmon Resonance data was analyzed using Scrubber 2.0  
Leginon 3.3 was used to analyze cryo-EM data.  
Peptide identification completed using Mascot (version 2.3) (<https://www.matrixscience.com/>)  
Differential HDX analysis completed using HDX Workbench(4.8.90) (<http://hdxworkbench.com/>)  
MatchMaker was used to align FG peptide to crystallographic structure (version 1.16)  
The all-atom (AA) molecular dynamics (MD) were performed with GROMACS software version gromacs/2019.4.  
Visualization of the AA MD trajectories, figure preparation, and density map calculation of CPSF6 filaments was done with VMD visualization

software version vmd/1.9.3.

DED frame stack was motion corrected using MotionCor2 (1.5.0)

For manuscripts utilizing custom algorithms or software that are central to the research but not yet described in published literature, software must be made available to editors and reviewers. We strongly encourage code deposition in a community repository (e.g. GitHub). See the Nature Portfolio [guidelines for submitting code & software](#) for further information.

## Data

Policy information about [availability of data](#)

All manuscripts must include a [data availability statement](#). This statement should provide the following information, where applicable:

- Accession codes, unique identifiers, or web links for publicly available datasets
- A description of any restrictions on data availability
- For clinical datasets or third party data, please ensure that the statement adheres to our [policy](#)

All processed data is available in the manuscript or the supplementary materials. All raw data is available in the file of source data. The Raw integration site sequencing results are deposited at the National Center for Biotechnology Sequences Read Archive with accession number PRJNA787708 [<https://www.ncbi.nlm.nih.gov/bioproject/PRJNA787708>]. The coordinates of the crystal structure of CAhex + IP6 + CPSF6(313-327) are deposited in the Protein Data Bank under accession code: 7SNQ [<https://doi.org/10.2210/pdb7SNQ/pdb>]. Cryo-EM maps of CA + IP6 + GST-CPSF6(261-358) and CA + IP6 + GST-CPSF6(261-358, ΔFG) are deposited with EMDB codes EMD-27617 [<https://www.ebi.ac.uk/emdb/EMD-27617>], EMD-27619 [<https://www.ebi.ac.uk/emdb/EMD-27619>] and EMD-27625 [<https://www.ebi.ac.uk/emdb/EMD-27625>]. HDX MS results are deposited to the ProteomeXchange Consortium via the PRIDE partner repository with the data set identifier PXD030332 [<https://www.ebi.ac.uk/pride/archive/projects/PXD030332>].

## Human research participants

Policy information about [studies involving human research participants and Sex and Gender in Research](#).

Reporting on sex and gender

NA

Population characteristics

NA

Recruitment

NA

Ethics oversight

NA

Note that full information on the approval of the study protocol must also be provided in the manuscript.

## Field-specific reporting

Please select the one below that is the best fit for your research. If you are not sure, read the appropriate sections before making your selection.

Life sciences       Behavioural & social sciences       Ecological, evolutionary & environmental sciences

For a reference copy of the document with all sections, see [nature.com/documents/nr-reporting-summary-flat.pdf](https://nature.com/documents/nr-reporting-summary-flat.pdf)

## Life sciences study design

All studies must disclose on these points even when the disclosure is negative.

Sample size

All experiments in this study were performed at least in triplicates with reproducible data. Sample sizes were determined based on the authors experience (Bester et al, Science, 2020; Rebensburg et al, Nature microbiology, 2021) and standard generally accepted in the field of virology (Adarsh et al, Nature microbiology, 2020) to generate reliable results.

Data exclusions

Data were not excluded from analysis.

Replication

Each experiment was reproduced at least three times with similar results. All attempts at replication were successful.

Randomization

Bacterial colonies from transformations were selected randomly. The cells for microscopy assay were chosen randomly from different views. Randomization is not relevant to other experiments because samples are allocated to experimental groups based on differences that are intrinsic to the samples

Blinding

None of the data was blinded as data were quantitative and measurements were made using relevant instruments and software.

## Reporting for specific materials, systems and methods

## Materials & experimental systems

## Methods

| n/a                                 | Involved in the study                                     |
|-------------------------------------|-----------------------------------------------------------|
| <input type="checkbox"/>            | <input checked="" type="checkbox"/> Antibodies            |
| <input type="checkbox"/>            | <input checked="" type="checkbox"/> Eukaryotic cell lines |
| <input checked="" type="checkbox"/> | <input type="checkbox"/> Palaeontology and archaeology    |
| <input checked="" type="checkbox"/> | <input type="checkbox"/> Animals and other organisms      |
| <input checked="" type="checkbox"/> | <input type="checkbox"/> Clinical data                    |
| <input checked="" type="checkbox"/> | <input type="checkbox"/> Dual use research of concern     |

| n/a                                 | Involved in the study                           |
|-------------------------------------|-------------------------------------------------|
| <input checked="" type="checkbox"/> | <input type="checkbox"/> ChIP-seq               |
| <input checked="" type="checkbox"/> | <input type="checkbox"/> Flow cytometry         |
| <input checked="" type="checkbox"/> | <input type="checkbox"/> MRI-based neuroimaging |

## Antibodies

### Antibodies used

anti-HIV-1 p24 monoclonal antibody (AG 3.0)(ARP-4121, NIH AIDS Reagent Program)  
 anti-HIV-1 p24 antibody (ab32352, Abcam)  
 anti-HA antibody [EPR22819-101] (ab236632, Abcam)  
 anti-HA antibody (NB600-362, Novus bio)  
 anti-Flag antibody (M2)(F1804, Sigma)  
 anti-GST antibody (8-326) (MA4-004-HRP, ThermoFisher)  
 anti-CPSF6 antibody [EPR12898](ab175237, Abcam)  
 anti-Sec24C antibody (ab122633, Abcam)  
 anti-Nup153 antibody (NB100-93329, Novus)  
 anti-GAPDH antibody (6C5)(sc-47724, Santa Cruz)  
 goat anti-rabbit IgG (H+L) secondary antibody (65-6120, Invitrogen)  
 goat anti-mouse IgG (H+L) secondary antibody conjugated (65-6520, Invitrogen)  
 Anti-SC35 antibody [SC-35] (ab11826, abcam)  
 Anti-SON Antibody (HPA031755, Atlas antibodies)  
 Goat anti-rabbit-AlexaFluor 405 (A-31556, ThermoFisher)

### Validation

All antibodies except anti-HIV-1 p24 monoclonal antibody were obtained commercially and were validated by respective vendors. Anti-HIV-1 p24 monoclonal antibody (AG 3.0) was obtained from NIH AIDS Reagent Program and validated as reported (Francis et al, Plos Pathogen, 2016; Francis and Melikyan, Cell host&microbe 2018; Rebensburg et al, Nature microbiology, 2021).  
 anti-HIV-1 p55+p24+p17 antibody (ab63917, Abcam): Rabbit polyclonal antibody to HIV1 p55 + p24 + p17 suitable for WB and ELISA <https://www.abcam.com/hiv1-p55--p24--p17-antibody-ab63917.html>  
 anti-HA antibody [EPR22819-101] (ab236632, Abcam): Rabbit monoclonal antibody to HA tag suitable for Flow Cyt (Intra), WB, IP, ICC/IF. <https://www.abcam.com/ha-tag-antibody-epr22819-101-ab236632.html>  
 anti-HA antibody (NB600-362, Novus bio): Goat polyclonal antibody to HA tag suitable for WB, ELISA, ICC/IF, IHC, IP. [https://www.novusbio.com/products/ha-tag-antibody\\_nb600-362](https://www.novusbio.com/products/ha-tag-antibody_nb600-362)  
 anti-Flag antibody (M2)(F1804, Sigma):mouse monoclonal antibody to Flag tag suitable for WB, ICC/IF, IHC, IP. <https://www.sigmaaldrich.com/US/en/product/sigma/f1804>  
 anti-GST antibody ((8-326) (MA4-004-HRP, ThermoFisher): Mouse monoclonal antibody to GST tag suitable for WB and ICC/IF. <https://www.thermofisher.com/antibody/product/GST-Tag-Antibody-clone-8-326-Monoclonal/MA4-004-HRP>  
 anti-CPSF6 antibody [EPR12898](ab175237, Abcam): Rabbit monoclonal antibody to mouse, rat and human CPSF6 suitable for ICC/IF, Flow Cytometry, IP, IHC-P, WB. <https://www.abcam.com/cpsf6-antibody-epr12898-ab175237.html>  
 anti-Sec24C antibody (ab122633, abcam): Rabbit polyclonal antibody to human Sec24C suitable for IHC-P, ICC/IF, WB. <https://www.abcam.com/sec24c-antibody-ab122633.html>  
 anti-Nup153 antibody (NB100-93329, Novus): Rabbit polyclonal antibody to human Nup153 suitable for WB, ICC/IF, IP and KO [https://www.novusbio.com/products/nup153-antibody\\_nb100-93329](https://www.novusbio.com/products/nup153-antibody_nb100-93329)  
 anti-GAPDH (6C5)(sc-32233, SantaCruz):mouse monoclonal antibody to GAPDH of mouse, rat, human, rabbit and Xenopus origin suitable for WB, IP and IF. <https://www.scbt.com/p/gapdh-antibody-6c5>  
 goat anti-rabbit IgG (H+L) secondary antibody (65-6120, Invitrogen): Goat polyclonal antibody to Rabbit IgG suitable for WB, IHC, ELISA and IP. <https://www.thermofisher.com/antibody/product/Goat-anti-Rabbit-IgG-H-L-Secondary-Antibody-Polyclonal/65-6120>  
 goat anti-mouse IgG (H+L) secondary antibody conjugated (65-6520, Invitrogen): Goat polyclonal antibody to mouse IgG suitable for WB, IHC and ELISA. <https://www.thermofisher.com/antibody/product/Goat-anti-Mouse-IgG-H-L-Secondary-Antibody-Polyclonal/62-6520>  
 Anti-SC35 antibody [SC-35] (ab11826, abcam): mouse monoclonal to SC35 suitable for ICC/IF. <https://www.abcam.com/sc35-antibody-sc-35-nuclear-speckle-marker-ab11826.html>  
 Anti-SON Antibody (HPA031755, Atlas antibodies):Rabbit polyclonal antibody against Human SON suitable for WB, Immunofluorescence in Cell Lines (ICC/IF). <https://www.atlasantibodies.com/products/antibodies/primary-antibodies/triple-a-polyclonals/son-antibody-hpa031755/>  
 Goat anti-rabbit-AlexaFluor 405 (A-31556, ThermoFisher): Goat polyclonal antibody conjugated with Alexa Fluor™ 405 against Rabbit IgG(H+L) suitable for (ICC/IF). <https://www.thermofisher.com/antibody/product/Goat-anti-Rabbit-IgG-H-L-Cross-Adsorbed-Secondary-Antibody-Polyclonal/A-31556>

## Eukaryotic cell lines

Policy information about [cell lines and Sex and Gender in Research](#)

Cell line source(s)

HEK293T (ATCC, CRL-3216)  
Phoenix-AMPHO (ATCC, CRL-3213)  
HeLa (ATCC, CCL-2)  
TZM-bl (NIH AIDS Reagent Program, 8129)  
CPSF6 knockout HEK293T (CKO) (Sowd, et al, PNAS, 2016; Li, et al, mbio, 2020)

Authentication

HEK293T, HeLa and TZM-bl were authenticated by the ATCC STR profiling. Phoenix-ampho and CPSF6 knockout HEK293T cells were not authenticated.

Mycoplasma contamination

Cell lines were tested monthly for Mycoplasma contamination and no contamination was found

Commonly misidentified lines  
(See [ICLAC](#) register)

No commonly misidentified cell lines were used in the study
